# Supplementary material
Source: publisher site journal article supplement (https://www.dovepress.com/article/398371)
Supplement: Supplementary file 1 [file get_supplementary_file.php]

## Title

### **An Integrated Analysis Reveals Ciliary Abnormalities in Antrochoanal Polyps**

#### Authors

Xiaoxue Zi<sup>1\*</sup>, Yang Peng<sup>2\*</sup>, Yiran Zang<sup>1</sup>, Shiyong Chen<sup>2</sup>, Mengshi Li<sup>3</sup>, Kena Yu<sup>1</sup>, Xu Liang<sup>1</sup>, Peng Jin<sup>1†</sup>, Deyun Wang<sup>4</sup>, Li Shi<sup>1</sup>

1. Department of Otolaryngology, The Second Hospital of Shandong University, Jinan, Shandong, China
2. State Key Laboratory of Respiratory Disease, National Clinical Research Center for Respiratory Disease, Guangzhou Institute of Respiratory Health, First Affiliated Hospital of Guangzhou Medical University, Guangzhou Medical University, Guangzhou, Guangdong, China
3. State Key Laboratory of Respiratory Disease, Department of Respiratory Pathology, Guangzhou Institute of Respiratory Health, National Clinical Research Center for Respiratory Disease, The First Affiliated Hospital of Guangzhou Medical University, Guangzhou, China
4. Department of Otolaryngology, National University of Singapore, National University Health System, Singapore, Singapore

\*: These authors contributed equally to this paper

†: Corresponding author

## **Methods**

### **RNA sequencing (RNA-seq) and data processing**

#### 1. Sample collection and preparation

##### (1) RNA quantification and qualification

① RNA degradation and contamination was monitored on 1% agarose gels.

② RNA purity was checked using the NanoPhotometer® spectrophotometer (IMPLEN, CA, USA).

③ RNA integrity was assessed using the RNA Nano 6000 Assay Kit of the Bioanalyzer 2100 system (Agilent Technologies, CA, USA).

##### (2) Library preparation for Transcriptome sequencing

A total amount of 1 µg RNA per sample was used as input material for the RNA sample preparations. Sequencing libraries were generated using NEBNext® Ultra™ RNA Library Prep Kit for Illumina® (NEB, USA) following manufacturer's recommendations and index codes were added to attribute sequences to each sample. Briefly, mRNA was purified from total RNA using poly-T oligo-attached magnetic beads. Fragmentation was carried out using divalent cations under elevated temperature in NEBNext First Strand Synthesis Reaction Buffer(5X). First strand cDNA was synthesized using random hexamer primer and M-MuLV Reverse Transcriptase (RNase H). Second strand cDNA synthesis was subsequently performed using DNA Polymerase I and RNase H. Remaining overhangs were converted into blunt ends via exonuclease/polymerase activities. After adenylation of 3' ends of

DNA fragments, NEBNext Adaptor with hairpin loop structure were ligated to prepare for hybridization. In order to select cDNA fragments of preferentially 250~300 bp in length, the library fragments were purified with AMPure XP system (Beckman Coulter, Beverly, USA). Then 3 µl USER Enzyme (NEB, USA) was used with size-selected, adaptor-ligated cDNA at 37°C for 15 min followed by 5 min at 95 °C before PCR. Then PCR was performed with Phusion High-Fidelity DNA polymerase, Universal PCR primers and Index (X) Primer. At last, PCR products were purified (AMPure XP system) and library quality was assessed on the Agilent Bioanalyzer 2100 system.

### (3) Clustering and sequencing (Genchem Experimental Department)

The clustering of the index-coded samples was performed on a cBot Cluster Generation System using TruSeq PE Cluster Kit v3-cBot-HS (Illumina) according to the manufacturer's instructions. After cluster generation, the library preparations were sequenced on an Illumina Novaseq platform and 150 bp paired-end reads were generated.

## 2. Data Analysis

### (1) Quality control

Raw data (raw reads) of fastq format were firstly processed through in-house perl scripts. In this step, clean data (clean reads) were obtained by removing reads containing adapter, reads containing ploy-N and low quality reads from raw data. At the same time, Q20, Q30 and GC content the clean data were calculated. All the downstream analyses were based on the clean data with high quality.

## (2) Reads mapping to the reference genome

Reference genome and gene model annotation files were downloaded from genome website directly. Index of the reference genome was built using Hisat2 v2.0.5 and paired-end clean reads were aligned to the reference genome using Hisat2 v2.0.5.

We selected Hisat2 as the mapping tool for that Hisat2 can generate a database of splice junctions based on the gene model annotation file and thus a better mapping result than other non-splice mapping tools.

## (3) Novel transcripts prediction

The mapped reads of each sample were assembled by StringTie (v1.3.3b) (Mihaela Pertea et al. 2015) in a reference-based approach. StringTie uses a novel network flow algorithm as well as an optional de novo assembly step to assemble and quantitate fulllength transcripts representing multiple splice variants for each gene locus.

## (4) Quantification of gene expression level

FeatureCounts v1.5.0-p3 was used to count the reads numbers mapped to each gene. And then FPKM of each gene was calculated based on the length of the gene and reads count mapped to this gene. FPKM, expected number of Fragments Per Kilobase of transcript sequence per Millions base pairs sequenced, considers the effect of sequencing depth and gene length for the reads count at the same time, and is currently the most commonly used method for estimating gene expression levels.

## (5) Bioinformatics analysis of the RNA-seq

Differential expression analysis between the two groups was performed using the DESeq2 R package (1.16.1). The resulting *P*-values were adjusted using the Benjamini and Hochberg's approach for controlling the false discovery rate. Genes with an adjusted *P* value <0.05 found by DESeq2 were assigned as differentially expressed. Gene Ontology (GO) enrichment and Kyoto Encyclopedia of Genes and Genomes (KEGG) pathway analysis of differentially expressed genes were implemented by the clusterProfiler R package, in which gene length bias was corrected. Terms with corrected *P* values less than 0.05 were considered significantly enriched by differential expressed genes. Gene set enrichment analysis (GSEA) is a computational method used to determine whether a predefined set of genes shows statistically significant and consistent differences between two groups of phenotypes, etc. The GSEA official software package was used for analysis.

### **RNA extraction and Real Time RT-PCR**

Total RNA was extracted from frozen nasal tissues in RNA later by using the mirVana™ isolation kit (Applied Biosystems, Foster City, CA) and 1 µg total RNA was reverse transcribed with reversing transcription kit (Thermo, USA) based on the manufacturer's protocol. cDNA were diluted in 40µl nuclease free water. After validating the quality of cDNA, Real-time RT-PCR analysis (Mastercycler Nexus, Eppendorf, Germany) was performed to evaluate the expression levels of 9 cilia-related genes (*FOXJ1*, *DNAI1*, *DNAH9*, *RSPH1*, *RSPH9*, *RSPH4A*, *CP110*, *DNAH5*, *DNAL1*) and 8 inflammatory factors ( *CCL7*, *CCL18*, *CCL20*, *CXCL6*, *CXCL8*, *IL17REL* , *IFNG* and *IL13RA2* ) . Glyceraldehyde-3-phosphate dehydrogenase (GAPDH) was used as housekeeping genes for the tissue mRNA. Relative mRNA levels were calculated by using the comparative  $2^{-\Delta\Delta Ct}$  methods, with

the housekeeping gene as the reference.

### **Immunofluorescence (IF) assay**

To explore the expression patterns of epithelial markers and ciliary structure, including  $\alpha$ -tubulin (1:500, ab24610 ) and forkhead Box J1 (FOXJ1)( 1:100, Sigma HPA005714) for ciliated cells, keratin 5 (KRT5)(1:150, Biolegend 905903) for basal cell, mucin 5AC (MUC5AC) (1:100, Thermo Fisher MA5-12178)for goblet cells, DNAI1(1:100, HPA021649) for outer dynein arm, RSPH4A(1:100, HPA031196) for radial spoke. We then incubated the slides with Alexa Fluor 488-, 555-, and 647-conjugated secondary antibodies at 37 °C for 1 hour at 1:500 dilution.

## Figure legends

**Figure E1. Validation of the expression levels of 8 inflammatory factors in nasal mucosa between patients with ACPs (n = 17) and controls (n = 20) with qRT-PCR.** Data were analyzed by Mann–Whitney 2-sided nonparametric test. Median values with range are indicated.  $P < 0.05$  was statistically significant. *CCL7*, C-C motif chemokine ligand 7; *CCL18*, C-C motif chemokine ligand 18; *CCL20*, C-C motif chemokine ligand 20; *CXCL6*, C-X-C motif chemokine ligand 6; *CXCL8*, C-X-C motif chemokine ligand 8; *IFNG*, interferon gamma; *IL13RA2*, interleukin 13 receptor subunit alpha 2; *IL17REL*, interleukin 17 receptor E like. ACPs, antrochoanal polyps; qRT-PCR, quantitative reverse transcription polymerase chain reaction.

**Figure E2. The correlation between *FOXJ1* and the 8 inflammatory factors in ACPs (n = 17).** The mRNA expression of *FOXJ1* and *CCL7* (A), *FOXJ1* and *CCL18* (B), *FOXJ1* and *CCL20* (C), *FOXJ1* and *CXCL6* (D), *FOXJ1* and *CXCL8* (E), *FOXJ1* and *IL17REL* (F), *FOXJ1* and *IFNG* (G), *FOXJ1* and *IL13RA2* (H). The correlation analysis was performed by Spearman's correlation analysis.  $P < 0.05$  was statistically significant. *FOXJ1*, forkhead box J1; *CCL7*, C-C motif chemokine ligand 7; *CCL18*, C-C motif chemokine ligand 18; *CCL20*, C-C motif chemokine ligand 20; *CXCL6*, C-X-C motif chemokine ligand 6; *CXCL8*, C-X-C motif chemokine ligand 8; *IFNG*, interferon gamma; *IL13RA2*, interleukin 13 receptor subunit alpha 2; *IL17REL*,

interleukin 17 receptor E like. ACPs, antrochoanal polyps.



## Figures

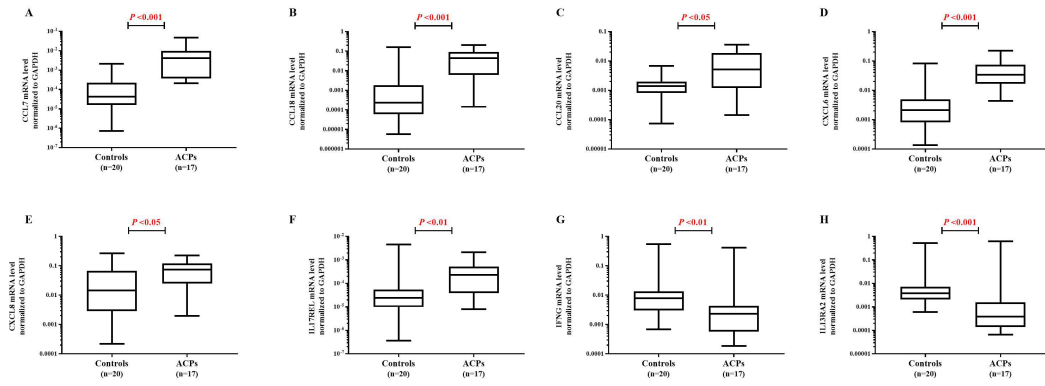

## Figure E1

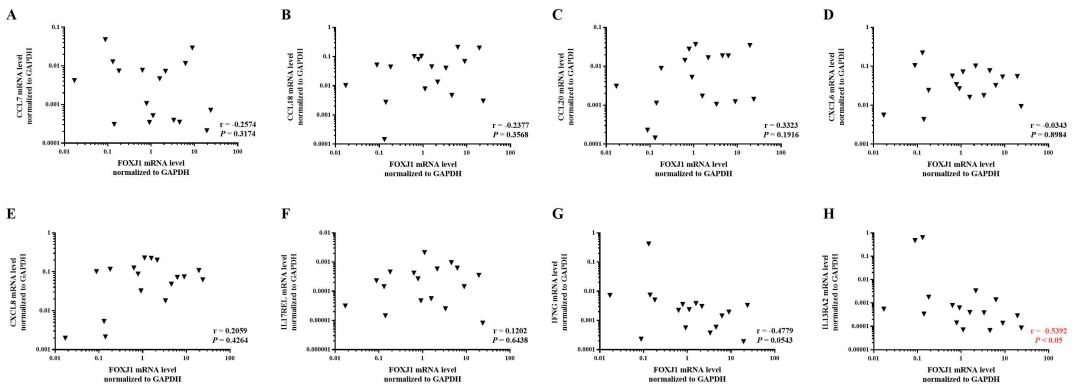

## Figure E2

Table E1. The top 20 upregulated and downregulated DEGs.

|                           | Gene Symbol | Gene ID | log2 (ACPs / UPs) | adj. <i>P</i> value (ACPs / UPs) | Chromosome   | Start     | End       |
|---------------------------|-------------|---------|-------------------|----------------------------------|--------------|-----------|-----------|
| <b>Downregulated DEGs</b> |             |         |                   |                                  |              |           |           |
|                           | MUC7        | 4589    | -16.62403564      | 1.70E-21                         | NC_000004.12 | 70430492  | 70482997  |
|                           | BPIFB3      | 359710  | -15.88696536      | 4.26E-50                         | NC_000020.11 | 33055331  | 33073637  |
|                           | PRB1        | 5542    | -15.71601318      | 3.05E-21                         | NC_000012.12 | 11351823  | 11355590  |
|                           | C6orf58     | 352999  | -15.28704964      | 2.54E-71                         | NC_000006.12 | 127577174 | 127591818 |
|                           | CRISP3      | 10321   | -15.1386356       | 1.06E-42                         | NC_000006.12 | 49727376  | 49744455  |
|                           | DMBT1       | 1755    | -13.95930464      | 1.00E-192                        | NC_000010.11 | 122560660 | 122643817 |
|                           | SMR3B       | 10879   | -13.59233573      | 7.21E-09                         | NC_000004.12 | 70383078  | 70390244  |
|                           | PRB4        | 5545    | -13.43509282      | 1.64E-35                         | NC_000012.12 | 11307081  | 11310435  |
|                           | PRB3        | 5544    | -13.36374034      | 6.58E-33                         | NC_000012.12 | 11265914  | 11269707  |
|                           | STATH       | 6779    | -13.13359364      | 5.59E-41                         | NC_000004.12 | 69995931  | 70002456  |
|                           | GP2         | 2813    | -12.79103618      | 1.32E-39                         | NC_000016.10 | 20309574  | 20327805  |
|                           | BPIFB2      | 80341   | -12.39163063      | 3.87E-91                         | NC_000020.11 | 33007578  | 33023709  |
|                           | SMR3A       | 26952   | -11.6716528       | 2.18E-37                         | NC_000004.12 | 70360776  | 70367158  |
|                           | SOX10       | 6663    | -11.38613416      | 1.60E-84                         | NC_000022.11 | 37970134  | 37985352  |
|                           | LPO         | 4025    | -11.2407978       | 4.01E-151                        | NC_000017.11 | 58238426  | 58268518  |
|                           | PRR4        | 11272   | -10.78902303      | 1.50E-62                         | NC_000012.12 | 10845849  | 10849476  |
|                           | CHRM1       | 1128    | -10.74419971      | 5.98E-32                         | NC_000011.10 | 62908675  | 62921861  |
|                           | LTF         | 4057    | -10.70473896      | 3.07E-109                        | NC_000003.12 | 46413625  | 46508535  |
|                           | ODAM        | 54959   | -10.34076232      | 6.02E-68                         | NC_000004.12 | 70195728  | 70204576  |
|                           | PPP1R1B     | 84152   | -10.12426203      | 1.01E-128                        | NC_000017.11 | 39626735  | 39637032  |

**Upregulated  
DEGs**

|          |        |             |             |              |           |           |
|----------|--------|-------------|-------------|--------------|-----------|-----------|
| NKX3-2   | 579    | 5.909269643 | 1.24E-06    | NC_000004.12 | 13540830  | 13544490  |
| S100A8   | 6279   | 5.921946067 | 3.14E-13    | NC_000001.11 | 153390032 | 153422583 |
| ALPK2    | 115701 | 5.93646603  | 2.87E-12    | NC_000018.10 | 58481247  | 58629357  |
| MARCO    | 8685   | 6.026617329 | 3.71E-10    | NC_000002.12 | 118942169 | 118994664 |
| KRTAP1-5 | 83895  | 6.053316954 | 2.80E-04    | NC_000017.11 | 41026026  | 41027202  |
| MCEMP1   | 199675 | 6.119031945 | 6.93E-08    | NC_000019.10 | 7676063   | 7761701   |
| SLURP2   | 432355 | 6.145396965 | 4.71E-09    | NC_000008.11 | 142764338 | 142769828 |
| SMIM6    | 1E+08  | 6.289971631 | 3.92E-08    | NC_000017.11 | 75644790  | 75648651  |
| CST6     | 1474   | 6.389552074 | 1.78E-08    | NC_000011.10 | 66011991  | 66013505  |
| WNT2     | 7472   | 6.630922646 | 6.00E-08    | NC_000007.14 | 117276631 | 117323289 |
| DEFB4A   | 1673   | 6.746235489 | 0.037424564 | NC_000008.11 | 7894565   | 7896716   |
| PSG5     | 5673   | 6.973402433 | 3.30E-07    | NC_000019.10 | 43166256  | 43186536  |
| XAGE2    | 9502   | 7.001377845 | 2.06E-05    | NC_000023.11 | 52322375  | 52384742  |
| CCL18    | 6362   | 7.027657774 | 1.85E-16    | NC_000017.11 | 36064272  | 36071481  |
| SPRR2A   | 6700   | 7.09579701  | 0.001080139 | NC_000001.11 | 153039725 | 153057563 |
| PTPRN    | 5798   | 7.220755689 | 3.49E-08    | NC_000002.12 | 219287537 | 219309605 |
| SPRR3    | 6707   | 7.420995754 | 9.84E-06    | NC_000001.11 | 153001662 | 153024640 |
| GPR1     | 2825   | 7.425895845 | 5.44E-16    | NC_000002.12 | 206175316 | 206218047 |
| EPYC     | 1833   | 9.740016678 | 9.31E-09    | NC_000012.12 | 90963679  | 91007916  |
| CCL7     | 6354   | 9.75029787  | 1.52E-06    | NC_000017.11 | 34270216  | 34272242  |

---

Table E2. GO biological processes (BP) items of the DEGs.

| GO_P Term ID | GO_P Term Desc                            | GO_P Term Level1   | GO_P Term Level2                              | Term Candidate Gene Num | Total Candidate Gene Num | Term Gene Num | Total Gene Num | Rich Ratio | P value  | Q value  |
|--------------|-------------------------------------------|--------------------|-----------------------------------------------|-------------------------|--------------------------|---------------|----------------|------------|----------|----------|
| GO:0030030   | cell projection organization              | biological_process | cellular component organization or biogenesis | 89                      | 3366                     | 195           | 24363          | 0.45641    | 3.87E-27 | 2.80E-23 |
| GO:0007155   | cell adhesion                             | biological_process | biological adhesion                           | 212                     | 3366                     | 777           | 24363          | 0.272844   | 8.64E-24 | 3.13E-20 |
| GO:0006954   | inflammatory response                     | biological_process | response to stimulus                          | 149                     | 3366                     | 532           | 24363          | 0.280075   | 3.76E-18 | 9.07E-15 |
| GO:0002376   | immune system process                     | biological_process | immune system process                         | 145                     | 3366                     | 517           | 24363          | 0.280464   | 9.35E-18 | 1.69E-14 |
| GO:0003341   | cilium movement                           | biological_process | cellular process                              | 33                      | 3366                     | 51            | 24363          | 0.647059   | 8.04E-17 | 1.16E-13 |
| GO:0010469   | regulation of signaling receptor activity | biological_process | cellular process                              | 128                     | 3366                     | 449           | 24363          | 0.285078   | 1.97E-16 | 2.38E-13 |
| GO:0030198   | extracellular matrix organization         | biological_process | cellular process                              | 90                      | 3366                     | 275           | 24363          | 0.327273   | 7.44E-16 | 7.69E-13 |
| GO:0007166   | cell surface receptor signaling pathway   | biological_process | regulation of biological process              | 107                     | 3366                     | 359           | 24363          | 0.29805    | 2.21E-15 | 1.87E-12 |
| GO:0060271   | cilium assembly                           | biological_process | cellular component organization or biogenesis | 83                      | 3366                     | 248           | 24363          | 0.334677   | 2.32E-15 | 1.87E-12 |
| GO:0006935   | chemotaxis                                | biological_process | locomotion                                    | 69                      | 3366                     | 197           | 24363          | 0.350254   | 4.17E-14 | 3.02E-11 |
| GO:0006811   | ion transport                             | biological_process | localization                                  | 167                     | 3366                     | 690           | 24363          | 0.242029   | 9.03E-14 | 5.95E-11 |
| GO:0007267   | cell-cell signaling                       | biological_process | signaling                                     | 85                      | 3366                     | 287           | 24363          | 0.296167   | 2.39E-12 | 1.44E-09 |

|            |                                                    |                    |                                  |     |      |      |       |          |          |          |
|------------|----------------------------------------------------|--------------------|----------------------------------|-----|------|------|-------|----------|----------|----------|
| GO:0030593 | neutrophil chemotaxis                              | biological_process | immune system process            | 43  | 3366 | 105  | 24363 | 0.409524 | 6.88E-12 | 3.32E-09 |
| GO:0043312 | neutrophil degranulation                           | biological_process | immune system process            | 163 | 3366 | 702  | 24363 | 0.232194 | 6.72E-12 | 3.32E-09 |
| GO:0055085 | transmembrane transport                            | biological_process | localization                     | 149 | 3366 | 625  | 24363 | 0.2384   | 6.82E-12 | 3.32E-09 |
| GO:0007018 | microtubule-based movement                         | biological_process | cellular process                 | 43  | 3366 | 106  | 24363 | 0.40566  | 1.00E-11 | 4.55E-09 |
| GO:0006955 | immune response                                    | biological_process | immune system process            | 141 | 3366 | 598  | 24363 | 0.235786 | 5.77E-11 | 2.46E-08 |
| GO:0034220 | ion transmembrane transport                        | biological_process | localization                     | 79  | 3366 | 287  | 24363 | 0.275261 | 6.86E-10 | 2.76E-07 |
| GO:0035735 | intraciliary transport involved in cilium assembly | biological_process | localization                     | 25  | 3366 | 50   | 24363 | 0.5      | 1.11E-09 | 4.23E-07 |
| GO:0019221 | cytokine-mediated signaling pathway                | biological_process | biological regulation            | 97  | 3366 | 386  | 24363 | 0.251295 | 1.82E-09 | 6.59E-07 |
| GO:0010951 | negative regulation of endopeptidase activity      | biological_process | metabolic process                | 48  | 3366 | 146  | 24363 | 0.328767 | 3.31E-09 | 1.14E-06 |
| GO:0007165 | signal transduction                                | biological_process | regulation of biological process | 397 | 3366 | 2201 | 24363 | 0.180373 | 3.54E-09 | 1.17E-06 |
| GO:0071805 | potassium ion transmembrane transport              | biological_process | localization                     | 47  | 3366 | 143  | 24363 | 0.328671 | 4.85E-09 | 1.53E-06 |
| GO:0036159 | inner dynein arm assembly                          | biological_process | cellular process                 | 14  | 3366 | 19   | 24363 | 0.736842 | 5.28E-09 | 1.59E-06 |

|            |                                           |                    |                                  |     |      |      |       |          |          |          |
|------------|-------------------------------------------|--------------------|----------------------------------|-----|------|------|-------|----------|----------|----------|
| GO:0010466 | negative regulation of peptidase activity | biological_process | metabolic process                | 42  | 3366 | 122  | 24363 | 0.344262 | 6.71E-09 | 1.94E-06 |
| GO:0035082 | axoneme assembly                          | biological_process | cellular process                 | 15  | 3366 | 22   | 24363 | 0.681818 | 8.07E-09 | 2.25E-06 |
| GO:0036158 | outer dynein arm assembly                 | biological_process | cellular process                 | 15  | 3366 | 23   | 24363 | 0.652174 | 2.02E-08 | 5.42E-06 |
| GO:0044458 | motile cilium assembly                    | biological_process | cellular process                 | 16  | 3366 | 26   | 24363 | 0.615385 | 2.28E-08 | 5.89E-06 |
| GO:0009612 | response to mechanical stimulus           | biological_process | response to stimulus             | 32  | 3366 | 85   | 24363 | 0.376471 | 3.68E-08 | 8.88E-06 |
| GO:0042073 | intraciliary transport                    | biological_process | cellular process                 | 19  | 3366 | 36   | 24363 | 0.527778 | 3.57E-08 | 8.88E-06 |
| GO:0070098 | chemokine-mediated signaling pathway      | biological_process | biological regulation            | 31  | 3366 | 82   | 24363 | 0.378049 | 5.34E-08 | 1.25E-05 |
| GO:0055114 | oxidation-reduction process               | biological_process | metabolic process                | 159 | 3366 | 772  | 24363 | 0.205959 | 9.62E-08 | 2.18E-05 |
| GO:0001503 | ossification                              | biological_process | multicellular organismal process | 39  | 3366 | 119  | 24363 | 0.327731 | 1.04E-07 | 2.29E-05 |
| GO:0007268 | chemical synaptic transmission            | biological_process | signaling                        | 74  | 3366 | 294  | 24363 | 0.251701 | 1.36E-07 | 2.91E-05 |
| GO:0003351 | epithelial cilium movement                | biological_process | cellular process                 | 13  | 3366 | 20   | 24363 | 0.65     | 1.95E-07 | 4.04E-05 |
| GO:0007275 | multicellular organism development        | biological_process | developmental process            | 239 | 3366 | 1272 | 24363 | 0.187893 | 2.42E-07 | 4.74E-05 |
| GO:0030574 | collagen catabolic process                | biological_process | metabolic process                | 20  | 3366 | 43   | 24363 | 0.465116 | 2.36E-07 | 4.74E-05 |
| GO:0070286 | axonemal dynein                           | biological_process | cellular process                 | 10  | 3366 | 13   | 24363 | 0.769231 | 4.80E-07 | 9.15E-05 |

|            |                                              |                    |                                  |     |      |     |       |          |          |          |
|------------|----------------------------------------------|--------------------|----------------------------------|-----|------|-----|-------|----------|----------|----------|
|            | complex assembly                             |                    |                                  |     |      |     |       |          |          |          |
| GO:0006814 | sodium ion transport                         | biological_process | localization                     | 41  | 3366 | 137 | 24363 | 0.29927  | 7.83E-07 | 1.45E-04 |
| GO:0001525 | angiogenesis                                 | biological_process | developmental process            | 83  | 3366 | 359 | 24363 | 0.231198 | 1.16E-06 | 2.10E-04 |
| GO:0071300 | cellular response to retinoic acid           | biological_process | response to stimulus             | 29  | 3366 | 84  | 24363 | 0.345238 | 1.30E-06 | 2.30E-04 |
| GO:0030199 | collagen fibril organization                 | biological_process | cellular process                 | 25  | 3366 | 68  | 24363 | 0.367647 | 1.86E-06 | 3.20E-04 |
| GO:0002548 | monocyte chemotaxis                          | biological_process | locomotion                       | 22  | 3366 | 56  | 24363 | 0.392857 | 2.11E-06 | 3.55E-04 |
| GO:0019722 | calcium-mediated signaling                   | biological_process | response to stimulus             | 33  | 3366 | 104 | 24363 | 0.317308 | 2.19E-06 | 3.60E-04 |
| GO:0090023 | positive regulation of neutrophil chemotaxis | biological_process | regulation of biological process | 15  | 3366 | 30  | 24363 | 0.5      | 2.45E-06 | 3.94E-04 |
| GO:0006813 | potassium ion transport                      | biological_process | localization                     | 42  | 3366 | 148 | 24363 | 0.283784 | 2.69E-06 | 4.24E-04 |
| GO:0007399 | nervous system development                   | biological_process | developmental process            | 132 | 3366 | 652 | 24363 | 0.202454 | 2.98E-06 | 4.59E-04 |
| GO:0001501 | skeletal system development                  | biological_process | developmental process            | 49  | 3366 | 185 | 24363 | 0.264865 | 3.68E-06 | 5.44E-04 |
| GO:0060285 | cilium-dependent cell motility               | biological_process | locomotion                       | 13  | 3366 | 24  | 24363 | 0.541667 | 3.65E-06 | 5.44E-04 |
| GO:0019730 | antimicrobial humoral response               | biological_process | immune system process            | 23  | 3366 | 62  | 24363 | 0.370968 | 3.97E-06 | 5.76E-04 |
| GO:0045087 | innate immune response                       | biological_process | response to stimulus             | 135 | 3366 | 674 | 24363 | 0.200297 | 4.13E-06 | 5.86E-04 |
| GO:0002544 | chronic inflammatory                         | biological_process | response to stimulus             | 8   | 3366 | 10  | 24363 | 0.8      | 4.57E-06 | 6.24E-04 |

|            |                                                            |                    |                                  |     |      |     |       |          |          |          |
|------------|------------------------------------------------------------|--------------------|----------------------------------|-----|------|-----|-------|----------|----------|----------|
|            | response                                                   |                    |                                  |     |      |     |       |          |          |          |
| GO:0006898 | receptor-mediated endocytosis                              | biological_process | localization                     | 53  | 3366 | 207 | 24363 | 0.256039 | 4.50E-06 | 6.24E-04 |
| GO:0034765 | regulation of ion transmembrane transport                  | biological_process | regulation of biological process | 47  | 3366 | 177 | 24363 | 0.265537 | 5.34E-06 | 7.16E-04 |
| GO:0042493 | response to drug                                           | biological_process | response to stimulus             | 86  | 3366 | 394 | 24363 | 0.218274 | 8.58E-06 | 0.00113  |
| GO:0006508 | proteolysis                                                | biological_process | metabolic process                | 140 | 3366 | 714 | 24363 | 0.196078 | 8.77E-06 | 0.001134 |
| GO:0042554 | superoxide anion generation                                | biological_process | metabolic process                | 10  | 3366 | 16  | 24363 | 0.625    | 9.01E-06 | 0.001145 |
| GO:0007204 | positive regulation of cytosolic calcium ion concentration | biological_process | cellular process                 | 50  | 3366 | 196 | 24363 | 0.255102 | 9.21E-06 | 0.00115  |
| GO:0007154 | cell communication                                         | biological_process | cellular process                 | 20  | 3366 | 53  | 24363 | 0.377358 | 1.24E-05 | 0.001525 |
| GO:0007368 | determination of left/right symmetry                       | biological_process | developmental process            | 28  | 3366 | 89  | 24363 | 0.314607 | 1.50E-05 | 0.001808 |
| GO:0070374 | positive regulation of ERK1 and ERK2 cascade               | biological_process | metabolic process                | 71  | 3366 | 315 | 24363 | 0.225397 | 1.66E-05 | 0.001969 |
| GO:0007422 | peripheral nervous system development                      | biological_process | developmental process            | 14  | 3366 | 31  | 24363 | 0.451613 | 2.34E-05 | 0.002691 |
| GO:0019229 | regulation of vasoconstriction                             | biological_process | regulation of biological process | 14  | 3366 | 31  | 24363 | 0.451613 | 2.34E-05 | 0.002691 |
| GO:0061844 | antimicrobial humoral immune response mediated by          | biological_process | immune system process            | 35  | 3366 | 125 | 24363 | 0.28     | 2.41E-05 | 0.002733 |



|            |                                                   |                    |                                           |     |      |     |       |          |          |          |
|------------|---------------------------------------------------|--------------------|-------------------------------------------|-----|------|-----|-------|----------|----------|----------|
|            | antimicrobial peptide                             |                    |                                           |     |      |     |       |          |          |          |
| GO:0035235 | ionotropic glutamate receptor signaling pathway   | biological_process | regulation of biological process          | 12  | 3366 | 24  | 24363 | 0.5      | 2.54E-05 | 0.002827 |
| GO:0045471 | response to ethanol                               | biological_process | response to stimulus                      | 40  | 3366 | 151 | 24363 | 0.264901 | 2.74E-05 | 0.002965 |
| GO:0048247 | lymphocyte chemotaxis                             | biological_process | immune system process                     | 16  | 3366 | 39  | 24363 | 0.410256 | 2.71E-05 | 0.002965 |
| GO:0007229 | integrin-mediated signaling pathway               | biological_process | regulation of biological process          | 39  | 3366 | 146 | 24363 | 0.267123 | 2.80E-05 | 0.002981 |
| GO:0006629 | lipid metabolic process                           | biological_process | metabolic process                         | 113 | 3366 | 567 | 24363 | 0.199295 | 3.05E-05 | 0.003202 |
| GO:0009611 | response to wounding                              | biological_process | response to stimulus                      | 32  | 3366 | 112 | 24363 | 0.285714 | 3.42E-05 | 0.003538 |
| GO:0051965 | positive regulation of synapse assembly           | biological_process | developmental process                     | 25  | 3366 | 79  | 24363 | 0.316456 | 3.77E-05 | 0.003846 |
| GO:0050777 | negative regulation of immune response            | biological_process | negative regulation of biological process | 9   | 3366 | 15  | 24363 | 0.6      | 4.12E-05 | 0.004146 |
| GO:0006801 | superoxide metabolic process                      | biological_process | metabolic process                         | 12  | 3366 | 25  | 24363 | 0.48     | 4.27E-05 | 0.004232 |
| GO:0007507 | heart development                                 | biological_process | developmental process                     | 69  | 3366 | 313 | 24363 | 0.220447 | 4.58E-05 | 0.00448  |
| GO:0033564 | anterior/posterior axon guidance                  | biological_process | developmental process                     | 5   | 3366 | 5   | 24363 | 1        | 5.02E-05 | 0.004663 |
| GO:0046541 | saliva secretion                                  | biological_process | localization                              | 5   | 3366 | 5   | 24363 | 1        | 5.02E-05 | 0.004663 |
| GO:0060326 | cell chemotaxis                                   | biological_process | locomotion                                | 31  | 3366 | 109 | 24363 | 0.284404 | 4.96E-05 | 0.004663 |
| GO:1901318 | negative regulation of flagellated sperm motility | biological_process | regulation of biological process          | 5   | 3366 | 5   | 24363 | 1        | 5.02E-05 | 0.004663 |

|            |                                                                         |                    |                                  |     |      |     |       |          |          |          |
|------------|-------------------------------------------------------------------------|--------------------|----------------------------------|-----|------|-----|-------|----------|----------|----------|
| GO:0030041 | actin filament polymerization                                           | biological_process | cellular process                 | 16  | 3366 | 41  | 24363 | 0.390244 | 5.63E-05 | 0.005164 |
| GO:0032496 | response to lipopolysaccharide                                          | biological_process | response to stimulus             | 52  | 3366 | 220 | 24363 | 0.236364 | 5.81E-05 | 0.005232 |
| GO:0044267 | cellular protein metabolic process                                      | biological_process | metabolic process                | 61  | 3366 | 270 | 24363 | 0.225926 | 5.85E-05 | 0.005232 |
| GO:0007200 | phospholipase C-activating G protein-coupled receptor signaling pathway | biological_process | regulation of biological process | 23  | 3366 | 72  | 24363 | 0.319444 | 6.45E-05 | 0.005696 |
| GO:0007052 | mitotic spindle organization                                            | biological_process | cellular process                 | 18  | 3366 | 50  | 24363 | 0.36     | 6.93E-05 | 0.006048 |
| GO:0007288 | sperm axoneme assembly                                                  | biological_process | developmental process            | 9   | 3366 | 16  | 24363 | 0.5625   | 8.26E-05 | 0.007125 |
| GO:0002430 | complement receptor mediated signaling pathway                          | biological_process | regulation of biological process | 8   | 3366 | 13  | 24363 | 0.615385 | 8.84E-05 | 0.007199 |
| GO:0007626 | locomotory behavior                                                     | biological_process | behavior                         | 32  | 3366 | 117 | 24363 | 0.273504 | 8.66E-05 | 0.007199 |
| GO:0008284 | positive regulation of cell proliferation                               | biological_process | regulation of biological process | 134 | 3366 | 710 | 24363 | 0.188732 | 8.70E-05 | 0.007199 |
| GO:0035721 | intraciliary retrograde transport                                       | biological_process | localization                     | 8   | 3366 | 13  | 24363 | 0.615385 | 8.84E-05 | 0.007199 |
| GO:0060287 | epithelial cilium movement involved in determination of                 | biological_process | developmental process            | 8   | 3366 | 13  | 24363 | 0.615385 | 8.84E-05 | 0.007199 |

|            |                                                                           |                    |                                           |     |      |     |       |          |          |          |
|------------|---------------------------------------------------------------------------|--------------------|-------------------------------------------|-----|------|-----|-------|----------|----------|----------|
|            | left/right asymmetry                                                      |                    |                                           |     |      |     |       |          |          |          |
| GO:0071356 | cellular response to tumor necrosis factor                                | biological_process | response to stimulus                      | 44  | 3366 | 180 | 24363 | 0.244444 | 9.13E-05 | 0.007346 |
| GO:0010628 | positive regulation of gene expression                                    | biological_process | metabolic process                         | 104 | 3366 | 527 | 24363 | 0.197343 | 9.24E-05 | 0.007352 |
| GO:0007189 | adenylate cyclase-activating G protein-coupled receptor signaling pathway | biological_process | regulation of biological process          | 33  | 3366 | 123 | 24363 | 0.268293 | 1.02E-04 | 0.008011 |
| GO:0018108 | peptidyl-tyrosine phosphorylation                                         | biological_process | cellular process                          | 45  | 3366 | 187 | 24363 | 0.240642 | 1.13E-04 | 0.008831 |
| GO:0010575 | positive regulation of vascular endothelial growth factor production      | biological_process | regulation of biological process          | 15  | 3366 | 39  | 24363 | 0.384615 | 1.16E-04 | 0.008843 |
| GO:0045840 | positive regulation of mitotic nuclear division                           | biological_process | positive regulation of biological process | 13  | 3366 | 31  | 24363 | 0.419355 | 1.17E-04 | 0.008843 |
| GO:0060349 | bone morphogenesis                                                        | biological_process | developmental process                     | 15  | 3366 | 39  | 24363 | 0.384615 | 1.16E-04 | 0.008843 |
| GO:0007215 | glutamate receptor signaling pathway                                      | biological_process | regulation of biological process          | 10  | 3366 | 20  | 24363 | 0.5      | 1.22E-04 | 0.008862 |
| GO:0007411 | axon guidance                                                             | biological_process | developmental process                     | 57  | 3366 | 254 | 24363 | 0.224409 | 1.21E-04 | 0.008862 |
| GO:0035556 | intracellular signal transduction                                         | biological_process | regulation of biological process          | 116 | 3366 | 604 | 24363 | 0.192053 | 1.22E-04 | 0.008862 |
| GO:2000147 | positive regulation of                                                    | biological_process | regulation of biological                  | 10  | 3366 | 20  | 24363 | 0.5      | 1.22E-04 | 0.008862 |

|            |                                                                                |                    |                                  |    |      |     |       |          |          |          |
|------------|--------------------------------------------------------------------------------|--------------------|----------------------------------|----|------|-----|-------|----------|----------|----------|
|            | cell motility                                                                  |                    | process                          |    |      |     |       |          |          |          |
| GO:0030282 | bone mineralization                                                            | biological_process | developmental process            | 18 | 3366 | 52  | 24363 | 0.346154 | 1.24E-04 | 0.008928 |
| GO:0007605 | sensory perception of sound                                                    | biological_process | multicellular organismal process | 45 | 3366 | 190 | 24363 | 0.236842 | 1.68E-04 | 0.011795 |
| GO:0015721 | bile acid and bile salt transport                                              | biological_process | localization                     | 12 | 3366 | 28  | 24363 | 0.428571 | 1.67E-04 | 0.011795 |
| GO:0043576 | regulation of respiratory gaseous exchange                                     | biological_process | regulation of biological process | 7  | 3366 | 11  | 24363 | 0.636364 | 1.89E-04 | 0.01291  |
| GO:0048048 | embryonic eye morphogenesis                                                    | biological_process | developmental process            | 7  | 3366 | 11  | 24363 | 0.636364 | 1.89E-04 | 0.01291  |
| GO:0060054 | positive regulation of epithelial cell proliferation involved in wound healing | biological_process | regulation of biological process | 7  | 3366 | 11  | 24363 | 0.636364 | 1.89E-04 | 0.01291  |
| GO:0030317 | flagellated sperm motility                                                     | biological_process | localization                     | 24 | 3366 | 82  | 24363 | 0.292683 | 2.09E-04 | 0.014144 |
| GO:0001666 | response to hypoxia                                                            | biological_process | response to stimulus             | 52 | 3366 | 231 | 24363 | 0.225108 | 2.17E-04 | 0.014528 |
| GO:0042391 | regulation of membrane potential                                               | biological_process | biological regulation            | 33 | 3366 | 128 | 24363 | 0.257813 | 2.30E-04 | 0.015311 |
| GO:0050806 | positive regulation of synaptic transmission                                   | biological_process | regulation of biological process | 11 | 3366 | 25  | 24363 | 0.44     | 2.36E-04 | 0.015521 |
| GO:0035987 | endodermal cell differentiation                                                | biological_process | developmental process            | 14 | 3366 | 37  | 24363 | 0.378378 | 2.39E-04 | 0.01561  |
| GO:0051384 | response to glucocorticoid                                                     | biological_process | response to stimulus             | 24 | 3366 | 83  | 24363 | 0.289157 | 2.56E-04 | 0.016549 |

|            |                                                                    |                    |                                  |    |      |     |       |          |          |          |
|------------|--------------------------------------------------------------------|--------------------|----------------------------------|----|------|-----|-------|----------|----------|----------|
| GO:0050729 | positive regulation of inflammatory response                       | biological_process | regulation of biological process | 26 | 3366 | 93  | 24363 | 0.27957  | 2.62E-04 | 0.016803 |
| GO:0035873 | lactate transmembrane transport                                    | biological_process | localization                     | 5  | 3366 | 6   | 24363 | 0.833333 | 2.67E-04 | 0.016943 |
| GO:0007613 | memory                                                             | biological_process | multicellular organismal process | 30 | 3366 | 114 | 24363 | 0.263158 | 2.96E-04 | 0.018661 |
| GO:0048566 | embryonic digestive tract development                              | biological_process | multicellular organismal process | 10 | 3366 | 22  | 24363 | 0.454545 | 3.29E-04 | 0.020537 |
| GO:0035589 | G protein-coupled purinergic nucleotide receptor signaling pathway | biological_process | regulation of biological process | 8  | 3366 | 15  | 24363 | 0.533333 | 3.41E-04 | 0.021139 |
| GO:0001774 | microglial cell activation                                         | biological_process | immune system process            | 11 | 3366 | 26  | 24363 | 0.423077 | 3.58E-04 | 0.021426 |
| GO:0016485 | protein processing                                                 | biological_process | metabolic process                | 21 | 3366 | 70  | 24363 | 0.3      | 3.51E-04 | 0.021426 |
| GO:0038094 | Fc-gamma receptor signaling pathway                                | biological_process | immune system process            | 4  | 3366 | 4   | 24363 | 1        | 3.64E-04 | 0.021426 |
| GO:0048245 | eosinophil chemotaxis                                              | biological_process | immune system process            | 11 | 3366 | 26  | 24363 | 0.423077 | 3.58E-04 | 0.021426 |
| GO:1903539 | protein localization to postsynaptic membrane                      | biological_process | localization                     | 4  | 3366 | 4   | 24363 | 1        | 3.64E-04 | 0.021426 |
| GO:1990834 | response to odorant                                                | biological_process | response to stimulus             | 4  | 3366 | 4   | 24363 | 1        | 3.64E-04 | 0.021426 |
| GO:0006688 | glycosphingolipid                                                  | biological_process | metabolic process                | 6  | 3366 | 9   | 24363 | 0.666667 | 3.99E-04 | 0.022606 |

|            |                                                  |                    |                                  |     |      |      |       |          |          |          |
|------------|--------------------------------------------------|--------------------|----------------------------------|-----|------|------|-------|----------|----------|----------|
|            | biosynthetic process                             |                    |                                  |     |      |      |       |          |          |          |
| GO:0006936 | muscle contraction                               | biological_process | multicellular organismal process | 37  | 3366 | 153  | 24363 | 0.24183  | 3.96E-04 | 0.022606 |
| GO:0035356 | cellular triglyceride homeostasis                | biological_process | cellular process                 | 6   | 3366 | 9    | 24363 | 0.666667 | 3.99E-04 | 0.022606 |
| GO:0035988 | chondrocyte proliferation                        | biological_process | cell proliferation               | 7   | 3366 | 12   | 24363 | 0.583333 | 3.99E-04 | 0.022606 |
| GO:0097553 | calcium ion transmembrane import into cytosol    | biological_process | localization                     | 6   | 3366 | 9    | 24363 | 0.666667 | 3.99E-04 | 0.022606 |
| GO:0007218 | neuropeptide signaling pathway                   | biological_process | regulation of biological process | 30  | 3366 | 116  | 24363 | 0.258621 | 4.09E-04 | 0.022785 |
| GO:0043392 | negative regulation of DNA binding               | biological_process | biological regulation            | 15  | 3366 | 43   | 24363 | 0.348837 | 4.07E-04 | 0.022785 |
| GO:0001964 | startle response                                 | biological_process | response to stimulus             | 9   | 3366 | 19   | 24363 | 0.473684 | 4.51E-04 | 0.024546 |
| GO:0034097 | response to cytokine                             | biological_process | response to stimulus             | 22  | 3366 | 76   | 24363 | 0.289474 | 4.47E-04 | 0.024546 |
| GO:0045730 | respiratory burst                                | biological_process | metabolic process                | 9   | 3366 | 19   | 24363 | 0.473684 | 4.51E-04 | 0.024546 |
| GO:0007162 | negative regulation of cell adhesion             | biological_process | regulation of biological process | 18  | 3366 | 57   | 24363 | 0.315789 | 4.57E-04 | 0.024683 |
| GO:0030154 | cell differentiation                             | biological_process | developmental process            | 200 | 3366 | 1163 | 24363 | 0.171969 | 4.99E-04 | 0.026754 |
| GO:0045987 | positive regulation of smooth muscle contraction | biological_process | regulation of biological process | 10  | 3366 | 23   | 24363 | 0.434783 | 5.10E-04 | 0.027169 |
| GO:0045453 | bone resorption                                  | biological_process | multicellular organismal process | 12  | 3366 | 31   | 24363 | 0.387097 | 5.19E-04 | 0.027418 |
| GO:0007202 | activation of                                    | biological_process | biological regulation            | 15  | 3366 | 44   | 24363 | 0.340909 | 5.40E-04 | 0.028341 |

|            |                                                           |                    |                                  |    |      |     |       |          |          |          |
|------------|-----------------------------------------------------------|--------------------|----------------------------------|----|------|-----|-------|----------|----------|----------|
|            | phospholipase C activity                                  |                    |                                  |    |      |     |       |          |          |          |
| GO:0042472 | inner ear morphogenesis                                   | biological_process | developmental process            | 24 | 3366 | 87  | 24363 | 0.275862 | 5.49E-04 | 0.028635 |
| GO:0071625 | vocalization behavior                                     | biological_process | behavior                         | 8  | 3366 | 16  | 24363 | 0.5      | 6.00E-04 | 0.03062  |
| GO:0097242 | amyloid-beta clearance                                    | biological_process | multicellular organismal process | 8  | 3366 | 16  | 24363 | 0.5      | 6.00E-04 | 0.03062  |
| GO:0098742 | cell-cell adhesion via plasma-membrane adhesion molecules | biological_process | biological adhesion              | 8  | 3366 | 16  | 24363 | 0.5      | 6.00E-04 | 0.03062  |
| GO:0043547 | positive regulation of GTPase activity                    | biological_process | biological regulation            | 80 | 3366 | 407 | 24363 | 0.19656  | 6.33E-04 | 0.032088 |
| GO:0048661 | positive regulation of smooth muscle cell proliferation   | biological_process | cell proliferation               | 22 | 3366 | 78  | 24363 | 0.282051 | 6.61E-04 | 0.033268 |
| GO:0071347 | cellular response to interleukin-1                        | biological_process | response to stimulus             | 28 | 3366 | 109 | 24363 | 0.256881 | 7.03E-04 | 0.035117 |
| GO:0042742 | defense response to bacterium                             | biological_process | response to stimulus             | 49 | 3366 | 225 | 24363 | 0.217778 | 7.15E-04 | 0.035472 |
| GO:1905515 | non-motile cilium assembly                                | biological_process | cellular process                 | 18 | 3366 | 59  | 24363 | 0.305085 | 7.25E-04 | 0.03573  |
| GO:0001523 | retinoid metabolic process                                | biological_process | metabolic process                | 20 | 3366 | 69  | 24363 | 0.289855 | 7.83E-04 | 0.038303 |
| GO:0022617 | extracellular matrix disassembly                          | biological_process | cellular process                 | 23 | 3366 | 84  | 24363 | 0.27381  | 7.95E-04 | 0.038637 |
| GO:0002283 | neutrophil activation                                     | biological_process | response to stimulus             | 5  | 3366 | 7   | 24363 | 0.714286 | 8.26E-04 | 0.038868 |

|            |                                                        |                    |                                           |    |      |     |       |          |          |          |
|------------|--------------------------------------------------------|--------------------|-------------------------------------------|----|------|-----|-------|----------|----------|----------|
|            | involved in immune response                            |                    |                                           |    |      |     |       |          |          |          |
| GO:0003356 | regulation of cilium beat frequency                    | biological_process | regulation of biological process          | 5  | 3366 | 7   | 24363 | 0.714286 | 8.26E-04 | 0.038868 |
| GO:0006600 | creatine metabolic process                             | biological_process | metabolic process                         | 5  | 3366 | 7   | 24363 | 0.714286 | 8.26E-04 | 0.038868 |
| GO:0021532 | neural tube patterning                                 | biological_process | developmental process                     | 5  | 3366 | 7   | 24363 | 0.714286 | 8.26E-04 | 0.038868 |
| GO:0045630 | positive regulation of T-helper 2 cell differentiation | biological_process | developmental process                     | 5  | 3366 | 7   | 24363 | 0.714286 | 8.26E-04 | 0.038868 |
| GO:0003416 | endochondral bone growth                               | biological_process | developmental process                     | 6  | 3366 | 10  | 24363 | 0.6      | 8.82E-04 | 0.040673 |
| GO:0009968 | negative regulation of signal transduction             | biological_process | regulation of biological process          | 30 | 3366 | 121 | 24363 | 0.247934 | 8.70E-04 | 0.040673 |
| GO:0090238 | positive regulation of arachidonic acid secretion      | biological_process | regulation of biological process          | 6  | 3366 | 10  | 24363 | 0.6      | 8.82E-04 | 0.040673 |
| GO:0031175 | neuron projection development                          | biological_process | developmental process                     | 40 | 3366 | 176 | 24363 | 0.227273 | 8.93E-04 | 0.040965 |
| GO:0006816 | calcium ion transport                                  | biological_process | localization                              | 38 | 3366 | 165 | 24363 | 0.230303 | 9.11E-04 | 0.041502 |
| GO:0051897 | positive regulation of protein kinase B signaling      | biological_process | regulation of biological process          | 47 | 3366 | 216 | 24363 | 0.217593 | 9.23E-04 | 0.04181  |
| GO:0042130 | negative regulation of T cell proliferation            | biological_process | negative regulation of biological process | 20 | 3366 | 70  | 24363 | 0.285714 | 9.55E-04 | 0.042981 |
| GO:0035725 | sodium ion                                             | biological_process | localization                              | 21 | 3366 | 75  | 24363 | 0.28     | 9.63E-04 | 0.04304  |



|            |                                                    |                    |                                  |    |      |     |       |          |          |          |
|------------|----------------------------------------------------|--------------------|----------------------------------|----|------|-----|-------|----------|----------|----------|
|            | transmembrane transport                            |                    |                                  |    |      |     |       |          |          |          |
| GO:0002526 | acute inflammatory response                        | biological_process | response to stimulus             | 8  | 3366 | 17  | 24363 | 0.470588 | 9.97E-04 | 0.04333  |
| GO:0002687 | positive regulation of leukocyte migration         | biological_process | regulation of biological process | 8  | 3366 | 17  | 24363 | 0.470588 | 9.97E-04 | 0.04333  |
| GO:0008589 | regulation of smoothed signaling pathway           | biological_process | response to stimulus             | 12 | 3366 | 33  | 24363 | 0.363636 | 9.99E-04 | 0.04333  |
| GO:0060134 | prepulse inhibition                                | biological_process | regulation of biological process | 8  | 3366 | 17  | 24363 | 0.470588 | 9.97E-04 | 0.04333  |
| GO:0060294 | cilium movement involved in cell motility          | biological_process | locomotion                       | 8  | 3366 | 17  | 24363 | 0.470588 | 9.97E-04 | 0.04333  |
| GO:0014065 | phosphatidylinositol 3-kinase signaling            | biological_process | regulation of biological process | 14 | 3366 | 42  | 24363 | 0.333333 | 0.001056 | 0.045253 |
| GO:0051930 | regulation of sensory perception of pain           | biological_process | regulation of biological process | 14 | 3366 | 42  | 24363 | 0.333333 | 0.001056 | 0.045253 |
| GO:0006833 | water transport                                    | biological_process | localization                     | 10 | 3366 | 25  | 24363 | 0.4      | 0.001121 | 0.047478 |
| GO:0032331 | negative regulation of chondrocyte differentiation | biological_process | developmental process            | 10 | 3366 | 25  | 24363 | 0.4      | 0.001121 | 0.047478 |
| GO:0007611 | learning or memory                                 | biological_process | behavior                         | 21 | 3366 | 76  | 24363 | 0.276316 | 0.001159 | 0.048831 |
| GO:0006836 | neurotransmitter transport                         | biological_process | localization                     | 15 | 3366 | 47  | 24363 | 0.319149 | 0.001177 | 0.049288 |
| GO:0014070 | response to organic                                | biological_process | response to stimulus             | 34 | 3366 | 145 | 24363 | 0.234483 | 0.001186 | 0.049387 |

|            |                    |                    |                       |    |      |    |       |          |          |          |
|------------|--------------------|--------------------|-----------------------|----|------|----|-------|----------|----------|----------|
|            | cyclic compound    |                    |                       |    |      |    |       |          |          |          |
| GO:0060325 | face morphogenesis | biological_process | developmental process | 13 | 3366 | 38 | 24363 | 0.342105 | 0.001203 | 0.049791 |

Table E3. GO cellular component (CC) items of the DEGs.

| GO_C Term ID | GO_C Term Desc                           | GO_C Term Level1   | GO_C Term Level2           | Term Candidate Gene Num | Total Candidate Gene Num | Term Gene Num | Total Gene Num | Rich Ratio | P value  | Q value  |
|--------------|------------------------------------------|--------------------|----------------------------|-------------------------|--------------------------|---------------|----------------|------------|----------|----------|
| GO:0005576   | extracellular region                     | cellular_component | extracellular region       | 716                     | 3524                     | 2865          | 25187          | 0.249913   | 3.92E-63 | 3.94E-60 |
| GO:0005615   | extracellular space                      | cellular_component | extracellular region part  | 493                     | 3524                     | 1870          | 25187          | 0.263636   | 3.87E-49 | 1.94E-46 |
| GO:0005929   | cilium                                   | cellular_component | organelle                  | 176                     | 3524                     | 422           | 25187          | 0.417062   | 5.96E-45 | 1.99E-42 |
| GO:0042995   | cell projection                          | cellular_component | cell part                  | 303                     | 3524                     | 988           | 25187          | 0.30668    | 2.75E-43 | 6.91E-41 |
| GO:0016020   | membrane                                 | cellular_component | membrane                   | 1694                    | 3524                     | 9539          | 25187          | 0.177587   | 1.33E-40 | 2.67E-38 |
| GO:0005886   | plasma membrane                          | cellular_component | cell                       | 1200                    | 3524                     | 6315          | 25187          | 0.190024   | 3.02E-38 | 5.06E-36 |
| GO:0016021   | integral component of membrane           | cellular_component | membrane part              | 1294                    | 3524                     | 7102          | 25187          | 0.182202   | 1.14E-32 | 1.63E-30 |
| GO:0031012   | extracellular matrix                     | cellular_component | extracellular region       | 134                     | 3524                     | 343           | 25187          | 0.390671   | 5.76E-31 | 7.22E-29 |
| GO:0005856   | cytoskeleton                             | cellular_component | organelle                  | 361                     | 3524                     | 1446          | 25187          | 0.249654   | 1.86E-30 | 1.86E-28 |
| GO:0005887   | integral component of plasma membrane    | cellular_component | membrane part              | 422                     | 3524                     | 1778          | 25187          | 0.237345   | 1.82E-30 | 1.86E-28 |
| GO:0062023   | collagen-containing extracellular matrix | cellular_component | extracellular region part  | 142                     | 3524                     | 414           | 25187          | 0.342995   | 5.99E-26 | 5.47E-24 |
| GO:0031514   | motile cilium                            | cellular_component | organelle                  | 79                      | 3524                     | 182           | 25187          | 0.434066   | 3.55E-22 | 2.97E-20 |
| GO:0005930   | axoneme                                  | cellular_component | organelle                  | 62                      | 3524                     | 131           | 25187          | 0.473282   | 4.70E-20 | 3.63E-18 |
| GO:0005581   | collagen trimer                          | cellular_component | protein-containing complex | 52                      | 3524                     | 104           | 25187          | 0.5        | 2.27E-18 | 1.63E-16 |
| GO:0009986   | cell surface                             | cellular_component | cell                       | 204                     | 3524                     | 900           | 25187          | 0.226667   | 6.08E-13 | 4.07E-11 |

|            |                                   |                    |                            |     |      |      |       |          |          |          |
|------------|-----------------------------------|--------------------|----------------------------|-----|------|------|-------|----------|----------|----------|
| GO:0031225 | anchored component of membrane    | cellular_component | membrane                   | 59  | 3524 | 165  | 25187 | 0.357576 | 1.79E-12 | 1.13E-10 |
| GO:0030054 | cell junction                     | cellular_component | cell junction              | 216 | 3524 | 1016 | 25187 | 0.212598 | 7.84E-11 | 4.63E-09 |
| GO:0097542 | ciliary tip                       | cellular_component | organelle                  | 28  | 3524 | 56   | 25187 | 0.5      | 1.51E-10 | 8.44E-09 |
| GO:0030286 | dynein complex                    | cellular_component | organelle                  | 24  | 3524 | 45   | 25187 | 0.533333 | 5.55E-10 | 2.93E-08 |
| GO:0043235 | receptor complex                  | cellular_component | protein-containing complex | 71  | 3524 | 246  | 25187 | 0.288618 | 9.27E-10 | 4.66E-08 |
| GO:0005874 | microtubule                       | cellular_component | organelle                  | 116 | 3524 | 483  | 25187 | 0.240166 | 1.97E-09 | 9.42E-08 |
| GO:0009897 | external side of plasma membrane  | cellular_component | membrane                   | 92  | 3524 | 362  | 25187 | 0.254144 | 4.92E-09 | 2.24E-07 |
| GO:0036126 | sperm flagellum                   | cellular_component | organelle                  | 26  | 3524 | 56   | 25187 | 0.464286 | 5.17E-09 | 2.26E-07 |
| GO:0060076 | excitatory synapse                | cellular_component | synapse                    | 20  | 3524 | 37   | 25187 | 0.540541 | 1.13E-08 | 4.64E-07 |
| GO:0070821 | tertiary granule membrane         | cellular_component | organelle                  | 36  | 3524 | 97   | 25187 | 0.371134 | 1.16E-08 | 4.64E-07 |
| GO:0005788 | endoplasmic reticulum lumen       | cellular_component | membrane-enclosed lumen    | 92  | 3524 | 379  | 25187 | 0.242744 | 5.26E-08 | 2.03E-06 |
| GO:0045202 | synapse                           | cellular_component | synapse                    | 153 | 3524 | 723  | 25187 | 0.211618 | 6.42E-08 | 2.39E-06 |
| GO:0030667 | secretory granule membrane        | cellular_component | organelle                  | 45  | 3524 | 144  | 25187 | 0.3125   | 8.31E-08 | 2.98E-06 |
| GO:0030992 | intraciliary transport particle B | cellular_component | protein-containing complex | 17  | 3524 | 31   | 25187 | 0.548387 | 1.08E-07 | 3.74E-06 |
| GO:0005604 | basement membrane                 | cellular_component | extracellular region part  | 39  | 3524 | 121  | 25187 | 0.322314 | 2.40E-07 | 8.04E-06 |
| GO:0043025 | neuronal cell body                | cellular_component | cell                       | 119 | 3524 | 548  | 25187 | 0.217153 | 4.64E-07 | 1.50E-05 |
| GO:0016324 | apical plasma                     | cellular_component | membrane part              | 96  | 3524 | 430  | 25187 | 0.223256 | 1.66E-06 | 5.04E-05 |

|            |                                                            |                    |           |      |      |      |       |          |          |          |
|------------|------------------------------------------------------------|--------------------|-----------|------|------|------|-------|----------|----------|----------|
|            | membrane                                                   |                    |           |      |      |      |       |          |          |          |
| GO:0030141 | secretory granule                                          | cellular_component | organelle | 37   | 3524 | 120  | 25187 | 0.308333 | 1.63E-06 | 5.04E-05 |
| GO:0035579 | specific granule membrane                                  | cellular_component | organelle | 35   | 3524 | 115  | 25187 | 0.304348 | 4.27E-06 | 1.21E-04 |
| GO:0036038 | MKS complex                                                | cellular_component | organelle | 10   | 3524 | 15   | 25187 | 0.666667 | 4.34E-06 | 1.21E-04 |
| GO:0043005 | neuron projection                                          | cellular_component | cell      | 106  | 3524 | 496  | 25187 | 0.21371  | 4.12E-06 | 1.21E-04 |
| GO:0030424 | axon                                                       | cellular_component | cell part | 100  | 3524 | 466  | 25187 | 0.214592 | 6.34E-06 | 1.72E-04 |
| GO:0099061 | integral component of postsynaptic density membrane        | cellular_component | membrane  | 22   | 3524 | 61   | 25187 | 0.360656 | 1.33E-05 | 3.52E-04 |
| GO:0032391 | photoreceptor connecting cilium                            | cellular_component | organelle | 19   | 3524 | 51   | 25187 | 0.372549 | 3.02E-05 | 7.77E-04 |
| GO:0005737 | cytoplasm                                                  | cellular_component | cell part | 1286 | 3524 | 8450 | 25187 | 0.152189 | 3.90E-05 | 9.80E-04 |
| GO:0036064 | ciliary basal body                                         | cellular_component | organelle | 54   | 3524 | 228  | 25187 | 0.236842 | 5.65E-05 | 0.001384 |
| GO:0045211 | postsynaptic membrane                                      | cellular_component | membrane  | 71   | 3524 | 323  | 25187 | 0.219814 | 5.95E-05 | 0.001423 |
| GO:0043020 | NADPH oxidase complex                                      | cellular_component | membrane  | 8    | 3524 | 13   | 25187 | 0.615385 | 9.70E-05 | 0.002265 |
| GO:1903561 | extracellular vesicle                                      | cellular_component | organelle | 22   | 3524 | 70   | 25187 | 0.314286 | 1.46E-04 | 0.00333  |
| GO:0031234 | extrinsic component of cytoplasmic side of plasma membrane | cellular_component | membrane  | 25   | 3524 | 85   | 25187 | 0.294118 | 1.75E-04 | 0.003905 |
| GO:0097546 | ciliary base                                               | cellular_component | organelle | 16   | 3524 | 45   | 25187 | 0.355556 | 2.38E-04 | 0.005186 |
| GO:0035580 | specific granule lumen                                     | cellular_component | organelle | 24   | 3524 | 82   | 25187 | 0.292683 | 2.54E-04 | 0.00542  |

|            |                                           |                    |               |     |      |     |       |          |          |          |
|------------|-------------------------------------------|--------------------|---------------|-----|------|-----|-------|----------|----------|----------|
| GO:0097729 | 9+2 motile cilium                         | cellular_component | organelle     | 5   | 3524 | 6   | 25187 | 0.833333 | 2.84E-04 | 0.005931 |
| GO:0005858 | axonemal dynein complex                   | cellular_component | organelle     | 9   | 3524 | 18  | 25187 | 0.5      | 2.98E-04 | 0.006107 |
| GO:0005922 | connexin complex                          | cellular_component | cell junction | 10  | 3524 | 22  | 25187 | 0.454545 | 3.65E-04 | 0.007052 |
| GO:0016529 | sarcoplasmic reticulum                    | cellular_component | cell part     | 22  | 3524 | 74  | 25187 | 0.297297 | 3.54E-04 | 0.007052 |
| GO:0097228 | sperm principal piece                     | cellular_component | organelle     | 10  | 3524 | 22  | 25187 | 0.454545 | 3.65E-04 | 0.007052 |
| GO:0031262 | Ndc80 complex                             | cellular_component | organelle     | 4   | 3524 | 4   | 25187 | 1        | 3.83E-04 | 0.007249 |
| GO:0017146 | NMDA selective glutamate receptor complex | cellular_component | membrane      | 7   | 3524 | 12  | 25187 | 0.583333 | 4.32E-04 | 0.007892 |
| GO:0036157 | outer dynein arm                          | cellular_component | organelle     | 6   | 3524 | 9   | 25187 | 0.666667 | 4.29E-04 | 0.007892 |
| GO:0005813 | centrosome                                | cellular_component | organelle     | 121 | 3524 | 649 | 25187 | 0.186441 | 5.11E-04 | 0.009169 |
| GO:0005871 | kinesin complex                           | cellular_component | organelle     | 22  | 3524 | 78  | 25187 | 0.282051 | 7.86E-04 | 0.013614 |
| GO:0101003 | ficolin-1-rich granule membrane           | cellular_component | organelle     | 22  | 3524 | 78  | 25187 | 0.282051 | 7.86E-04 | 0.013614 |
| GO:0072686 | mitotic spindle                           | cellular_component | organelle     | 28  | 3524 | 109 | 25187 | 0.256881 | 8.59E-04 | 0.014623 |
| GO:0005879 | axonemal microtubule                      | cellular_component | organelle     | 5   | 3524 | 7   | 25187 | 0.714286 | 8.77E-04 | 0.01468  |
| GO:0008076 | voltage-gated potassium channel complex   | cellular_component | membrane      | 26  | 3524 | 99  | 25187 | 0.262626 | 9.08E-04 | 0.014946 |
| GO:0043229 | intracellular organelle                   | cellular_component | organelle     | 6   | 3524 | 10  | 25187 | 0.6      | 9.45E-04 | 0.015053 |
| GO:0044309 | neuron spine                              | cellular_component | cell part     | 6   | 3524 | 10  | 25187 | 0.6      | 9.45E-04 | 0.015053 |

|            |                                         |                    |           |     |      |     |       |          |          |          |
|------------|-----------------------------------------|--------------------|-----------|-----|------|-----|-------|----------|----------|----------|
| GO:0031982 | vesicle                                 | cellular_component | organelle | 48  | 3524 | 220 | 25187 | 0.218182 | 0.001017 | 0.015954 |
| GO:0042629 | mast cell granule                       | cellular_component | organelle | 11  | 3524 | 29  | 25187 | 0.37931  | 0.001198 | 0.018506 |
| GO:0045121 | membrane raft                           | cellular_component | membrane  | 64  | 3524 | 317 | 25187 | 0.201893 | 0.001438 | 0.02187  |
| GO:0016323 | basolateral plasma membrane             | cellular_component | cell part | 58  | 3524 | 282 | 25187 | 0.205674 | 0.001493 | 0.022373 |
| GO:0000776 | kinetochore                             | cellular_component | organelle | 35  | 3524 | 151 | 25187 | 0.231788 | 0.001571 | 0.023196 |
| GO:0032010 | phagolysosome                           | cellular_component | organelle | 4   | 3524 | 5   | 25187 | 0.8      | 0.001699 | 0.024726 |
| GO:0005814 | centriole                               | cellular_component | organelle | 46  | 3524 | 214 | 25187 | 0.214953 | 0.001756 | 0.02519  |
| GO:0098688 | parallel fiber to Purkinje cell synapse | cellular_component | synapse   | 9   | 3524 | 22  | 25187 | 0.409091 | 0.001799 | 0.02544  |
| GO:0005861 | troponin complex                        | cellular_component | organelle | 5   | 3524 | 8   | 25187 | 0.625    | 0.002069 | 0.028456 |
| GO:0098978 | glutamatergic synapse                   | cellular_component | synapse   | 92  | 3524 | 492 | 25187 | 0.186992 | 0.002043 | 0.028456 |
| GO:0042734 | presynaptic membrane                    | cellular_component | membrane  | 25  | 3524 | 100 | 25187 | 0.25     | 0.002368 | 0.032132 |
| GO:0030425 | dendrite                                | cellular_component | cell part | 106 | 3524 | 582 | 25187 | 0.182131 | 0.002407 | 0.032227 |
| GO:0001669 | acrosomal vesicle                       | cellular_component | organelle | 27  | 3524 | 111 | 25187 | 0.243243 | 0.00248  | 0.03281  |

|            |                                       |                    |                            |     |      |     |       |          |          |          |
|------------|---------------------------------------|--------------------|----------------------------|-----|------|-----|-------|----------|----------|----------|
|            |                                       |                    |                            |     |      |     |       |          | 4        |          |
| GO:0000777 | condensed chromosome kinetochore      | cellular_component | organelle                  | 30  | 3524 | 128 | 25187 | 0.234375 | 0.002728 | 0.033924 |
| GO:0001536 | radial spoke stalk                    | cellular_component | organelle                  | 3   | 3524 | 3   | 25187 | 1        | 0.002737 | 0.033924 |
| GO:0005589 | collagen type VI trimer               | cellular_component | protein-containing complex | 3   | 3524 | 3   | 25187 | 1        | 0.002737 | 0.033924 |
| GO:0005594 | collagen type IX trimer               | cellular_component | protein-containing complex | 3   | 3524 | 3   | 25187 | 1        | 0.002737 | 0.033924 |
| GO:0097545 | axonemal outer doublet                | cellular_component | organelle                  | 3   | 3524 | 3   | 25187 | 1        | 0.002737 | 0.033924 |
| GO:0005815 | microtubule organizing center         | cellular_component | organelle                  | 92  | 3524 | 497 | 25187 | 0.185111 | 0.002773 | 0.033946 |
| GO:0005881 | cytoplasmic microtubule               | cellular_component | organelle                  | 18  | 3524 | 65  | 25187 | 0.276923 | 0.002837 | 0.03432  |
| GO:0031410 | cytoplasmic vesicle                   | cellular_component | organelle                  | 136 | 3524 | 776 | 25187 | 0.175258 | 0.002925 | 0.034717 |
| GO:0046658 | anchored component of plasma membrane | cellular_component | membrane                   | 13  | 3524 | 41  | 25187 | 0.317073 | 0.002939 | 0.034717 |
| GO:0051233 | spindle midzone                       | cellular_component | organelle                  | 12  | 3524 | 37  | 25187 | 0.324324 | 0.003414 | 0.039853 |
| GO:0042383 | sarcolemma                            | cellular_component | membrane                   | 33  | 3524 | 147 | 25187 | 0.22449  | 0.003605 | 0.041604 |
| GO:0043197 | dendritic spine                       | cellular_component | cell part                  | 40  | 3524 | 188 | 25187 | 0.212766 | 0.00404  | 0.046182 |



|            |                                                |                    |                            |    |      |    |       |          |          |          |
|------------|------------------------------------------------|--------------------|----------------------------|----|------|----|-------|----------|----------|----------|
|            |                                                |                    |                            |    |      |    |       |          | 8        |          |
| GO:0030991 | intraciliary transport particle A              | cellular_component | protein-containing complex | 5  | 3524 | 9  | 25187 | 0.555556 | 0.004119 | 0.04647  |
| GO:0071944 | cell periphery                                 | cellular_component | cell part                  | 22 | 3524 | 88 | 25187 | 0.25     | 0.004185 | 0.046683 |
| GO:0000942 | condensed nuclear chromosome outer kinetochore | cellular_component | membrane-enclosed lumen    | 4  | 3524 | 6  | 25187 | 0.666667 | 0.004531 | 0.049989 |

Table E4. GO molecular function (MF) items of the DEGs.

| GO_F Term ID | GO_F Term Desc                                                          | GO_F Term Level1   | GO_F Term Level2             | Term Candidate Gene Num | Total Candidate Gene Num | Term Gene Num | Total Gene Num | Rich Ratio | P value  | Q value  |
|--------------|-------------------------------------------------------------------------|--------------------|------------------------------|-------------------------|--------------------------|---------------|----------------|------------|----------|----------|
| GO:0005515   | protein binding                                                         | molecular_function | binding                      | 1680                    | 3343                     | 9446          | 24468          | 0.177853   | 3.05E-49 | 6.70E-46 |
| GO:0005509   | calcium ion binding                                                     | molecular_function | binding                      | 243                     | 3343                     | 946           | 24468          | 0.256871   | 7.54E-24 | 8.29E-21 |
| GO:0005201   | extracellular matrix structural constituent                             | molecular_function | structural molecule activity | 62                      | 3343                     | 174           | 24468          | 0.356322   | 2.02E-13 | 1.48E-10 |
| GO:0008201   | heparin binding                                                         | molecular_function | binding                      | 69                      | 3343                     | 226           | 24468          | 0.30531    | 3.67E-11 | 2.02E-08 |
| GO:0003774   | motor activity                                                          | molecular_function | catalytic activity           | 46                      | 3343                     | 132           | 24468          | 0.348485   | 5.75E-10 | 1.86E-07 |
| GO:0030020   | extracellular matrix structural constituent conferring tensile strength | molecular_function | structural molecule activity | 22                      | 3343                     | 39            | 24468          | 0.564103   | 4.35E-10 | 1.86E-07 |
| GO:0030246   | carbohydrate binding                                                    | molecular_function | binding                      | 76                      | 3343                     | 274           | 24468          | 0.277372   | 5.91E-10 | 1.86E-07 |
| GO:0016491   | oxidoreductase activity                                                 | molecular_function | catalytic activity           | 140                     | 3343                     | 620           | 24468          | 0.225806   | 7.17E-10 | 1.97E-07 |
| GO:0005125   | cytokine activity                                                       | molecular_function | binding                      | 71                      | 3343                     | 255           | 24468          | 0.278431   | 1.79E-09 | 4.38E-07 |
| GO:0003777   | microtubule motor                                                       | molecular_function | catalytic activity           | 37                      | 3343                     | 101           | 24468          | 0.366337   | 5.71E-09 | 1.26E-06 |

|                |                                                                      |                    |                                  |     |      |     |       |          |          |          |
|----------------|----------------------------------------------------------------------|--------------------|----------------------------------|-----|------|-----|-------|----------|----------|----------|
| 7              | activity                                                             |                    |                                  |     |      |     |       |          |          |          |
| GO:000488<br>8 | transmembrane<br>signaling receptor<br>activity                      | molecular_function | molecular<br>transducer activity | 92  | 3343 | 376 | 24468 | 0.244681 | 1.11E-08 | 2.22E-06 |
| GO:003041<br>4 | peptidase inhibitor<br>activity                                      | molecular_function | molecular function<br>regulator  | 41  | 3343 | 121 | 24468 | 0.338843 | 1.23E-08 | 2.26E-06 |
| GO:003802<br>3 | signaling receptor<br>activity                                       | molecular_function | molecular<br>transducer activity | 84  | 3343 | 341 | 24468 | 0.246334 | 3.43E-08 | 5.81E-06 |
| GO:000857<br>4 | ATP-dependent<br>microtubule motor<br>activity,<br>plus-end-directed | molecular_function | catalytic activity               | 17  | 3343 | 31  | 24468 | 0.548387 | 7.57E-08 | 1.19E-05 |
| GO:000425<br>2 | serine-type<br>endopeptidase activity                                | molecular_function | catalytic activity               | 70  | 3343 | 275 | 24468 | 0.254545 | 1.20E-07 | 1.76E-05 |
| GO:000497<br>0 | ionotropic glutamate<br>receptor activity                            | molecular_function | molecular<br>transducer activity | 12  | 3343 | 18  | 24468 | 0.666667 | 3.45E-07 | 4.75E-05 |
| GO:000823<br>6 | serine-type peptidase<br>activity                                    | molecular_function | catalytic activity               | 49  | 3343 | 174 | 24468 | 0.281609 | 3.81E-07 | 4.94E-05 |
| GO:004550<br>3 | dynein light chain<br>binding                                        | molecular_function | binding                          | 17  | 3343 | 35  | 24468 | 0.485714 | 7.50E-07 | 9.17E-05 |
| GO:000510<br>2 | signaling receptor<br>binding                                        | molecular_function | binding                          | 122 | 3343 | 586 | 24468 | 0.208191 | 9.46E-07 | 1.10E-04 |
| GO:000521<br>6 | ion channel activity                                                 | molecular_function | transporter activity             | 53  | 3343 | 201 | 24468 | 0.263682 | 1.24E-06 | 1.37E-04 |
| GO:000489<br>6 | cytokine receptor<br>activity                                        | molecular_function | molecular<br>transducer activity | 19  | 3343 | 44  | 24468 | 0.431818 | 1.62E-06 | 1.70E-04 |

|            |                                                                    |                    |                              |     |      |     |       |          |          |          |
|------------|--------------------------------------------------------------------|--------------------|------------------------------|-----|------|-----|-------|----------|----------|----------|
| GO:0005244 | voltage-gated ion channel activity                                 | molecular_function | transporter activity         | 45  | 3343 | 163 | 24468 | 0.276074 | 2.02E-06 | 2.02E-04 |
| GO:0005518 | collagen binding                                                   | molecular_function | binding                      | 29  | 3343 | 87  | 24468 | 0.333333 | 2.34E-06 | 2.24E-04 |
| GO:0008233 | peptidase activity                                                 | molecular_function | catalytic activity           | 113 | 3343 | 544 | 24468 | 0.207721 | 2.63E-06 | 2.41E-04 |
| GO:0003674 | molecular_function                                                 | molecular_function | molecular_function           | 151 | 3343 | 777 | 24468 | 0.194337 | 3.53E-06 | 3.11E-04 |
| GO:0005044 | scavenger receptor activity                                        | molecular_function | cargo receptor activity      | 23  | 3343 | 63  | 24468 | 0.365079 | 4.50E-06 | 3.81E-04 |
| GO:0008289 | lipid binding                                                      | molecular_function | binding                      | 76  | 3343 | 341 | 24468 | 0.222874 | 8.73E-06 | 7.12E-04 |
| GO:0015293 | symporter activity                                                 | molecular_function | transporter activity         | 36  | 3343 | 127 | 24468 | 0.283465 | 1.08E-05 | 8.48E-04 |
| GO:0008009 | chemokine activity                                                 | molecular_function | binding                      | 22  | 3343 | 62  | 24468 | 0.354839 | 1.22E-05 | 9.29E-04 |
| GO:0048020 | CCR chemokine receptor binding                                     | molecular_function | binding                      | 15  | 3343 | 34  | 24468 | 0.441176 | 1.48E-05 | 0.001085 |
| GO:0005178 | integrin binding                                                   | molecular_function | binding                      | 47  | 3343 | 186 | 24468 | 0.252688 | 1.64E-05 | 0.001155 |
| GO:0008083 | growth factor activity                                             | molecular_function | molecular function regulator | 52  | 3343 | 213 | 24468 | 0.244131 | 1.69E-05 | 0.001155 |
| GO:0030021 | extracellular matrix structural constituent conferring compression | molecular_function | structural molecule activity | 10  | 3343 | 17  | 24468 | 0.588235 | 1.73E-05 | 0.001155 |

|                |                                                    |                    |                                 |    |      |     |       |          |          |          |
|----------------|----------------------------------------------------|--------------------|---------------------------------|----|------|-----|-------|----------|----------|----------|
|                | resistance                                         |                    |                                 |    |      |     |       |          |          |          |
| GO:005084<br>0 | extracellular matrix<br>binding                    | molecular_function | binding                         | 16 | 3343 | 39  | 24468 | 0.410256 | 2.35E-05 | 0.001522 |
| GO:000486<br>7 | serine-type<br>endopeptidase<br>inhibitor activity | molecular_function | molecular function<br>regulator | 34 | 3343 | 122 | 24468 | 0.278689 | 2.76E-05 | 0.001737 |
| GO:000801<br>7 | microtubule binding                                | molecular_function | binding                         | 75 | 3343 | 347 | 24468 | 0.216138 | 3.04E-05 | 0.001856 |
| GO:001986<br>4 | IgG binding                                        | molecular_function | binding                         | 9  | 3343 | 15  | 24468 | 0.6      | 3.76E-05 | 0.002179 |
| GO:004550<br>4 | dynein heavy chain<br>binding                      | molecular_function | binding                         | 9  | 3343 | 15  | 24468 | 0.6      | 3.76E-05 | 0.002179 |
| GO:001995<br>5 | cytokine binding                                   | molecular_function | binding                         | 18 | 3343 | 49  | 24468 | 0.367347 | 4.38E-05 | 0.002471 |
| GO:000526<br>7 | potassium channel<br>activity                      | molecular_function | transporter activity            | 26 | 3343 | 86  | 24468 | 0.302326 | 5.27E-05 | 0.002899 |
| GO:000553<br>9 | glycosaminoglycan<br>binding                       | molecular_function | binding                         | 13 | 3343 | 30  | 24468 | 0.433333 | 6.92E-05 | 0.003715 |
| GO:001617<br>5 | superoxide-generating<br>NADPH oxidase<br>activity | molecular_function | catalytic activity              | 7  | 3343 | 10  | 24468 | 0.7      | 7.25E-05 | 0.0038   |
| GO:001512<br>5 | bile acid<br>transmembrane<br>transporter activity | molecular_function | transporter activity            | 8  | 3343 | 13  | 24468 | 0.615385 | 8.15E-05 | 0.004172 |
| GO:000823<br>7 | metallopeptidase<br>activity                       | molecular_function | catalytic activity              | 44 | 3343 | 182 | 24468 | 0.241758 | 9.25E-05 | 0.004627 |

|            |                                                           |                    |                               |    |      |     |       |          |          |          |
|------------|-----------------------------------------------------------|--------------------|-------------------------------|----|------|-----|-------|----------|----------|----------|
| GO:0002020 | protease binding                                          | molecular_function | binding                       | 36 | 3343 | 141 | 24468 | 0.255319 | 1.21E-04 | 0.00592  |
| GO:0004222 | metalloendopeptidase activity                             | molecular_function | catalytic activity            | 37 | 3343 | 148 | 24468 | 0.25     | 1.56E-04 | 0.007482 |
| GO:0008329 | signaling pattern recognition receptor activity           | molecular_function | molecular transducer activity | 7  | 3343 | 11  | 24468 | 0.636364 | 1.76E-04 | 0.008231 |
| GO:0045505 | dynein intermediate chain binding                         | molecular_function | binding                       | 15 | 3343 | 41  | 24468 | 0.365854 | 1.97E-04 | 0.009044 |
| GO:0005042 | netrin receptor activity                                  | molecular_function | molecular transducer activity | 5  | 3343 | 6   | 24468 | 0.833333 | 2.53E-04 | 0.011116 |
| GO:0043394 | proteoglycan binding                                      | molecular_function | binding                       | 9  | 3343 | 18  | 24468 | 0.5      | 2.48E-04 | 0.011116 |
| GO:0005319 | lipid transporter activity                                | molecular_function | transporter activity          | 14 | 3343 | 38  | 24468 | 0.368421 | 2.94E-04 | 0.012693 |
| GO:0017147 | Wnt-protein binding                                       | molecular_function | binding                       | 16 | 3343 | 47  | 24468 | 0.340426 | 3.19E-04 | 0.013244 |
| GO:0045028 | G protein-coupled purinergic nucleotide receptor activity | molecular_function | molecular transducer activity | 8  | 3343 | 15  | 24468 | 0.533333 | 3.16E-04 | 0.013244 |
| GO:0004522 | ribonuclease A activity                                   | molecular_function | catalytic activity            | 4  | 3343 | 4   | 24468 | 1        | 3.48E-04 | 0.014181 |
| GO:0016174 | NAD(P)H oxidase activity                                  | molecular_function | catalytic activity            | 6  | 3343 | 9   | 24468 | 0.666667 | 3.75E-04 | 0.015016 |
| GO:0005249 | voltage-gated potassium channel                           | molecular_function | transporter activity          | 21 | 3343 | 73  | 24468 | 0.287671 | 5.63E-04 | 0.021516 |

|                |                                                                                                       |                    |                              |    |      |     |       |          |          |          |
|----------------|-------------------------------------------------------------------------------------------------------|--------------------|------------------------------|----|------|-----|-------|----------|----------|----------|
|                | activity                                                                                              |                    |                              |    |      |     |       |          |          |          |
| GO:000819<br>1 | metalloendopeptidase inhibitor activity                                                               | molecular_function | molecular function regulator | 8  | 3343 | 16  | 24468 | 0.5      | 5.56E-04 | 0.021516 |
| GO:001670<br>5 | oxidoreductase activity, acting on paired donors, with incorporation or reduction of molecular oxygen | molecular_function | catalytic activity           | 22 | 3343 | 78  | 24468 | 0.282051 | 5.67E-04 | 0.021516 |
| GO:000526<br>1 | cation channel activity                                                                               | molecular_function | transporter activity         | 13 | 3343 | 36  | 24468 | 0.361111 | 6.02E-04 | 0.022449 |
| GO:004830<br>6 | calcium-dependent protein binding                                                                     | molecular_function | binding                      | 24 | 3343 | 89  | 24468 | 0.269663 | 6.68E-04 | 0.024497 |
| GO:001995<br>6 | chemokine binding                                                                                     | molecular_function | binding                      | 10 | 3343 | 24  | 24468 | 0.416667 | 7.01E-04 | 0.025232 |
| GO:004840<br>7 | platelet-derived growth factor binding                                                                | molecular_function | binding                      | 7  | 3343 | 13  | 24468 | 0.538462 | 7.11E-04 | 0.025232 |
| GO:001512<br>9 | lactate transmembrane transporter activity                                                            | molecular_function | transporter activity         | 5  | 3343 | 7   | 24468 | 0.714286 | 7.84E-04 | 0.027379 |
| GO:000381<br>0 | protein-glutamine gamma-glutamyltransferase activity                                                  | molecular_function | catalytic activity           | 6  | 3343 | 10  | 24468 | 0.6      | 8.29E-04 | 0.027777 |
| GO:000551<br>6 | calmodulin binding                                                                                    | molecular_function | binding                      | 56 | 3343 | 270 | 24468 | 0.207407 | 8.33E-04 | 0.027777 |
| GO:000804      | axon guidance                                                                                         | molecular_function | molecular                    | 6  | 3343 | 10  | 24468 | 0.6      | 8.29E-04 | 0.027777 |

|            |                                                              |                    |                               |    |      |     |       |          |          |          |
|------------|--------------------------------------------------------------|--------------------|-------------------------------|----|------|-----|-------|----------|----------|----------|
| 6          | receptor activity                                            |                    | transducer activity           |    |      |     |       |          |          |          |
| GO:0001540 | amyloid-beta binding                                         | molecular_function | binding                       | 26 | 3343 | 101 | 24468 | 0.257426 | 8.76E-04 | 0.028768 |
| GO:0005031 | tumor necrosis factor-activated receptor activity            | molecular_function | molecular transducer activity | 8  | 3343 | 17  | 24468 | 0.470588 | 9.24E-04 | 0.029483 |
| GO:0015269 | calcium-activated potassium channel activity                 | molecular_function | transporter activity          | 8  | 3343 | 17  | 24468 | 0.470588 | 9.24E-04 | 0.029483 |
| GO:0008569 | ATP-dependent microtubule motor activity, minus-end-directed | molecular_function | catalytic activity            | 10 | 3343 | 25  | 24468 | 0.4      | 0.001026 | 0.031807 |
| GO:0042813 | Wnt-activated receptor activity                              | molecular_function | molecular transducer activity | 10 | 3343 | 25  | 24468 | 0.4      | 0.001026 | 0.031807 |
| GO:0005272 | sodium channel activity                                      | molecular_function | transporter activity          | 12 | 3343 | 34  | 24468 | 0.352941 | 0.001224 | 0.037414 |
| GO:0005520 | insulin-like growth factor binding                           | molecular_function | binding                       | 11 | 3343 | 30  | 24468 | 0.366667 | 0.001358 | 0.040932 |
| GO:0001968 | fibronectin binding                                          | molecular_function | binding                       | 13 | 3343 | 39  | 24468 | 0.333333 | 0.001423 | 0.041757 |
| GO:0005496 | steroid binding                                              | molecular_function | binding                       | 13 | 3343 | 39  | 24468 | 0.333333 | 0.001423 | 0.041757 |
| GO:0004656 | procollagen-proline 4-dioxygenase activity                   | molecular_function | catalytic activity            | 4  | 3343 | 5   | 24468 | 0.8      | 0.00155  | 0.042108 |



|            |                                                         |                    |                               |     |      |      |       |          |          |          |
|------------|---------------------------------------------------------|--------------------|-------------------------------|-----|------|------|-------|----------|----------|----------|
| GO:0005007 | fibroblast growth factor-activated receptor activity    | molecular_function | molecular transducer activity | 4   | 3343 | 5    | 24468 | 0.8      | 0.00155  | 0.042108 |
| GO:0005008 | Ras guanyl-nucleotide exchange factor activity          | molecular_function | binding                       | 35  | 3343 | 154  | 24468 | 0.227273 | 0.001487 | 0.042108 |
| GO:0016787 | hydrolase activity                                      | molecular_function | catalytic activity            | 268 | 3343 | 1659 | 24468 | 0.161543 | 0.001513 | 0.042108 |
| GO:0031005 | filamin binding                                         | molecular_function | binding                       | 8   | 3343 | 18   | 24468 | 0.444444 | 0.001465 | 0.042108 |
| GO:0031727 | CCR2 chemokine receptor binding                         | molecular_function | binding                       | 4   | 3343 | 5    | 24468 | 0.8      | 0.00155  | 0.042108 |
| GO:0004972 | NMDA glutamate receptor activity                        | molecular_function | molecular transducer activity | 5   | 3343 | 8    | 24468 | 0.625    | 0.001854 | 0.049078 |
| GO:0030550 | acetylcholine receptor inhibitor activity               | molecular_function | molecular function regulator  | 5   | 3343 | 8    | 24468 | 0.625    | 0.001854 | 0.049078 |
| GO:0046934 | phosphatidylinositol-4,5-bisphosphate 3-kinase activity | molecular_function | catalytic activity            | 23  | 3343 | 90   | 24468 | 0.255556 | 0.001873 | 0.049078 |

Table E5. KEGG pathways of the DEGs.

| KEGG Pathway Term ID | KEGG Pathway Term Desc                  | KEGG Pathway Term Level1             | KEGG Pathway Term Level2            | Term Candidate Gene Num | Total Candidate Gene Num | Term Gene Num | Total Gene Num | Rich Ratio | P value  | Q value  |
|----------------------|-----------------------------------------|--------------------------------------|-------------------------------------|-------------------------|--------------------------|---------------|----------------|------------|----------|----------|
| 4060                 | Cytokine-cytokine receptor interaction  | Environmental Information Processing | Signaling molecules and interaction | 115                     | 2147                     | 371           | 15870          | 0.309973   | 1.02E-18 | 3.73E-16 |
| 4080                 | Neuroactive ligand-receptor interaction | Environmental Information Processing | Signaling molecules and interaction | 90                      | 2147                     | 338           | 15870          | 0.266272   | 8.30E-11 | 1.51E-08 |
| 4974                 | Protein digestion and absorption        | Organismal Systems                   | Digestive system                    | 40                      | 2147                     | 105           | 15870          | 0.380952   | 2.50E-10 | 3.03E-08 |
| 4970                 | Salivary secretion                      | Organismal Systems                   | Digestive system                    | 39                      | 2147                     | 110           | 15870          | 0.354545   | 4.68E-09 | 4.26E-07 |
| 4024                 | cAMP signaling pathway                  | Environmental Information Processing | Signal transduction                 | 61                      | 2147                     | 255           | 15870          | 0.239216   | 4.53E-06 | 3.30E-04 |
| 4380                 | Osteoclast differentiation              | Organismal Systems                   | Development                         | 52                      | 2147                     | 210           | 15870          | 0.247619   | 7.95E-06 | 4.32E-04 |
| 4724                 | Glutamatergic synapse                   | Organismal Systems                   | Nervous system                      | 38                      | 2147                     | 137           | 15870          | 0.277372   | 8.30E-06 | 4.32E-04 |
| 4512                 | ECM-receptor interaction                | Environmental Information Processing | Signaling molecules and interaction | 35                      | 2147                     | 126           | 15870          | 0.277778   | 1.79E-05 | 8.17E-04 |
| 4062                 | Chemokine signaling                     | Organismal Systems                   | Immune system                       | 58                      | 2147                     | 252           | 15870          | 0.230159   | 2.62E-05 | 0.001059 |

|      |                                                  |                    |                                |     |      |     |       |          |          |          |
|------|--------------------------------------------------|--------------------|--------------------------------|-----|------|-----|-------|----------|----------|----------|
|      | pathway                                          |                    |                                |     |      |     |       |          |          |          |
| 4972 | Pancreatic secretion                             | Organismal Systems | Digestive system               | 31  | 2147 | 111 | 15870 | 0.279279 | 4.72E-05 | 0.00167  |
| 5146 | Amoebiasis                                       | Human Diseases     | Infectious diseases: Parasitic | 36  | 2147 | 137 | 15870 | 0.262774 | 5.05E-05 | 0.00167  |
| 590  | Arachidonic acid metabolism                      | Metabolism         | Lipid metabolism               | 24  | 2147 | 82  | 15870 | 0.292683 | 1.49E-04 | 0.004396 |
| 4610 | Complement and coagulation cascades              | Organismal Systems | Immune system                  | 31  | 2147 | 118 | 15870 | 0.262712 | 1.64E-04 | 0.004396 |
| 4750 | Inflammatory mediator regulation of TRP channels | Organismal Systems | Sensory system                 | 31  | 2147 | 119 | 15870 | 0.260504 | 1.93E-04 | 0.004396 |
| 4976 | Bile secretion                                   | Organismal Systems | Digestive system               | 24  | 2147 | 83  | 15870 | 0.289157 | 1.83E-04 | 0.004396 |
| 5200 | Pathways in cancer                               | Human Diseases     | Cancers: Overview              | 133 | 2147 | 733 | 15870 | 0.181446 | 1.91E-04 | 0.004396 |
| 260  | Glycine, serine and threonine metabolism         | Metabolism         | Amino acid metabolism          | 17  | 2147 | 51  | 15870 | 0.333333 | 2.45E-04 | 0.005252 |
| 5033 | Nicotine addiction                               | Human Diseases     | Substance dependence           | 15  | 2147 | 43  | 15870 | 0.348837 | 3.21E-04 | 0.006489 |
| 4657 | IL-17 signaling pathway                          | Organismal Systems | Immune system                  | 32  | 2147 | 129 | 15870 | 0.248062 | 4.00E-04 | 0.007667 |

|      |                                                      |                                      |                                   |    |      |     |       |          |          |          |
|------|------------------------------------------------------|--------------------------------------|-----------------------------------|----|------|-----|-------|----------|----------|----------|
| 5144 | Malaria                                              | Human Diseases                       | Infectious diseases:<br>Parasitic | 20 | 2147 | 68  | 15870 | 0.294118 | 4.79E-04 | 0.008726 |
| 5219 | Bladder cancer                                       | Human Diseases                       | Cancers:<br>Specific types        | 17 | 2147 | 56  | 15870 | 0.303571 | 8.37E-04 | 0.014511 |
| 4933 | AGE-RAGE signaling pathway in diabetic complications | Human Diseases                       | Endocrine and metabolic diseases  | 31 | 2147 | 131 | 15870 | 0.236641 | 0.001139 | 0.018847 |
| 591  | Linoleic acid metabolism                             | Metabolism                           | Lipid metabolism                  | 12 | 2147 | 35  | 15870 | 0.342857 | 0.001491 | 0.022863 |
| 4020 | Calcium signaling pathway                            | Environmental Information Processing | Signal transduction               | 52 | 2147 | 256 | 15870 | 0.203125 | 0.00157  | 0.022863 |
| 4670 | Leukocyte transendothelial migration                 | Organismal Systems                   | Immune system                     | 35 | 2147 | 156 | 15870 | 0.224359 | 0.001556 | 0.022863 |
| 4978 | Mineral absorption                                   | Organismal Systems                   | Digestive system                  | 18 | 2147 | 66  | 15870 | 0.272727 | 0.002325 | 0.032546 |
| 4911 | Insulin secretion                                    | Organismal Systems                   | Endocrine system                  | 25 | 2147 | 104 | 15870 | 0.240385 | 0.00261  | 0.035185 |
| 5418 | Fluid shear stress and atherosclerosis               | Human Diseases                       | Cardiovascular diseases           | 41 | 2147 | 198 | 15870 | 0.207071 | 0.003241 | 0.042133 |
| 5231 | Choline                                              | Human Diseases                       | Cancers:                          | 30 | 2147 | 135 | 15870 | 0.222222 | 0.003758 | 0.047169 |

|  |                         |  |          |  |  |  |  |  |  |  |
|--|-------------------------|--|----------|--|--|--|--|--|--|--|
|  | metabolism in<br>cancer |  | Overview |  |  |  |  |  |  |  |
|--|-------------------------|--|----------|--|--|--|--|--|--|--|

Table E6. The GSEA parameters details.

|                       |                                                            |
|-----------------------|------------------------------------------------------------|
| database_name:        | msigdb_c5_bp                                               |
| database_version:     | MSigDB database v6.2                                       |
| control_group_name:   | Con                                                        |
| treat_group_name:     | ACP                                                        |
| control_group_sample: | tpm_Con1, tpm_Con2, tpm_Con3, tpm_Con4, tpm_Con5, tpm_Con6 |
| treat_group_sample:   | tpm_ACP1, tpm_ACP2, tpm_ACP3, tpm_ACP4, tpm_ACP5, tpm_ACP6 |
| gene_num:             | 18914                                                      |
| gsea_metric:          | Signal2Noise                                               |
| gsea_permute:         | gene_set                                                   |
| gsea_nperm:           | 1000                                                       |
| gsea_set_min:         | 15                                                         |
| gsea_set_max:         | 500                                                        |
| gsea_order:           | descending                                                 |
| gsea_version:         | gsea-3.0                                                   |

Table E7.The GSEA items.

| NAME                                                                                | MSigDB C5(GO) biological processes Term Desc                                                                                                                                                                                                                                                                                                                                                                   | Original size | Size (after restricting to dataset) | ES       | NES      | NOM p-val | FDR q-val | RANK AT MAX | LEADING EDGE                          |
|-------------------------------------------------------------------------------------|----------------------------------------------------------------------------------------------------------------------------------------------------------------------------------------------------------------------------------------------------------------------------------------------------------------------------------------------------------------------------------------------------------------|---------------|-------------------------------------|----------|----------|-----------|-----------|-------------|---------------------------------------|
| GO_CILIUM_ORGANIZATION                                                              | A process that is carried out at the cellular level which results in the assembly, arrangement of constituent parts, or disassembly of a cilium, a specialized eukaryotic organelle that consists of a filiform extrusion of the cell surface. Each cilium is bounded by an extrusion of the cytoplasmic membrane, and contains a regular longitudinal array of microtubules, anchored basally in a centriole. | 188           | 187                                 | 0.586377 | 2.25303  | 0         | 0         | 6094        | tags=79%,<br>list=32%,<br>signal=115% |
| GO_CILIUM_MORPHOGENESIS                                                             | A process that is carried out at the cellular level and in which the structure of a cilium is organized.                                                                                                                                                                                                                                                                                                       | 207           | 205                                 | 0.582078 | 2.245388 | 0         | 0         | 6094        | tags=77%,<br>list=32%,<br>signal=112% |
| GO_ANTIGEN_PROCESSING_AND_PRESENTATION_OF_EXOGENOUS_PEPTIDE_ANTIGEN_VIA_MHC_CLASS_I | The process in which an antigen-presenting cell expresses a peptide antigen of exogenous origin on its cell surface in association with an MHC class I protein complex. The peptide antigen is typically, but not always, processed from a whole protein. Class I here refers to classical class I molecules.                                                                                                  | 66            | 65                                  | 0.609771 | 2.146041 | 0         | 3.14E-04  | 4810        | tags=68%,<br>list=25%,<br>signal=90%  |
| GO_CILIUM_MOVEMENT                                                                  | The directed, self-propelled movement of a cilium.                                                                                                                                                                                                                                                                                                                                                             | 36            | 36                                  | 0.654985 | 2.12425  | 0         | 2.36E-04  | 6210        | tags=92%,<br>list=33%,                |

|                                                                   |                                                                                                                                                                                                                                                                                                               |    |    |          |          |   |              |      |                                       |
|-------------------------------------------------------------------|---------------------------------------------------------------------------------------------------------------------------------------------------------------------------------------------------------------------------------------------------------------------------------------------------------------|----|----|----------|----------|---|--------------|------|---------------------------------------|
|                                                                   |                                                                                                                                                                                                                                                                                                               |    |    |          |          |   |              |      | signal=136%                           |
| GO_AXONEME_ASSEMBLY                                               | The assembly and organization of an axoneme, the bundle of microtubules and associated proteins that forms the core of cilia (also called flagella) in eukaryotic cells and is responsible for their movements.                                                                                               | 44 | 44 | 0.626592 | 2.088422 | 0 | 0.0011<br>32 | 6210 | tags=89%,<br>list=33%,<br>signal=132% |
| GO_ANAPHASE_PROMOTING_COMPLEX_DEPENDENT_CATABOLIC_PROCESS         | The chemical reactions and pathways resulting in the breakdown of a protein or peptide by hydrolysis of its peptide bonds, initiated by the covalent attachment of ubiquitin, with ubiquitin-protein ligation catalyzed by the anaphase-promoting complex, and mediated by the proteasome.                    | 77 | 77 | 0.575709 | 2.077858 | 0 | 0.0012<br>59 | 6568 | tags=81%,<br>list=35%,<br>signal=123% |
| GO_REGULATION_OF_MAST_CELL_ACTIVATION_INVOLVED_IN_IMMUNE_RESPONSE | Any process that modulates the frequency, rate, or extent of mast cell activation as part of an immune response.                                                                                                                                                                                              | 31 | 31 | 0.650732 | 2.062907 | 0 | 0.0013<br>48 | 1965 | tags=48%,<br>list=10%,<br>signal=54%  |
| GO_AXONEMAL_DYNEIN_COMPLEX_ASSEMBLY                               | The aggregation, arrangement and bonding together of a set of components to form an axonemal dynein complex, a dynein complex found in eukaryotic cilia and flagella, in which the motor domain heads interact with adjacent microtubules to generate a sliding force which is converted to a bending motion. | 22 | 22 | 0.690713 | 2.055208 | 0 | 0.0012<br>98 | 2923 | tags=77%,<br>list=15%,<br>signal=91%  |



|                                                               |                                                                                                                                                                                                                                                                                    |     |     |          |          |   |          |      |                                       |
|---------------------------------------------------------------|------------------------------------------------------------------------------------------------------------------------------------------------------------------------------------------------------------------------------------------------------------------------------------|-----|-----|----------|----------|---|----------|------|---------------------------------------|
| GO_CELL_PROJECTION_ASSEMBLY                                   | Formation of a prolongation or process extending from a cell, e.g. a flagellum or axon.                                                                                                                                                                                            | 264 | 263 | 0.518195 | 2.022424 | 0 | 0.002937 | 6299 | tags=68%,<br>list=33%,<br>signal=101% |
| GO_POSITIVE_REGULATION_OF_LIGASE_ACTIVITY                     | Any process that activates or increases the frequency, rate or extent of ligase activity, the catalysis of the ligation of two substances with concomitant breaking of a diphosphate linkage, usually in a nucleoside triphosphate.                                                | 110 | 107 | 0.545195 | 2.021428 | 0 | 0.002643 | 6568 | tags=71%,<br>list=35%,<br>signal=108% |
| GO_REGULATION_OF_CELLULAR_AMINO_ACID_METABOLIC_PROCESS        | Any process that modulates the frequency, rate or extent of the chemical reactions and pathways involving amino acids.                                                                                                                                                             | 66  | 65  | 0.571721 | 2.016051 | 0 | 0.002489 | 5267 | tags=69%,<br>list=28%,<br>signal=96%  |
| GO_REGULATION_OF_LIGASE_ACTIVITY                              | Any process that modulates the frequency, rate or extent of ligase activity, the catalysis of the ligation of two substances with concomitant breaking of a diphosphate linkage, usually in a nucleoside triphosphate. Ligase is the systematic name for any enzyme of EC class 6. | 130 | 127 | 0.529771 | 2.008704 | 0 | 0.002675 | 6568 | tags=69%,<br>list=35%,<br>signal=104% |
| GO_POSITIVE_REGULATION_OF_MYELOID_LEUKOCYTE_MEDIATED_IMMUNITY | Any process that activates or increases the frequency, rate, or extent of myeloid leukocyte mediated immunity.                                                                                                                                                                     | 18  | 18  | 0.700831 | 1.978983 | 0 | 0.003921 | 1743 | tags=50%,<br>list=9%,<br>signal=55%   |
| GO_CELLULAR_COMPONENT_ASSEMBLY                                | The cellular component assembly that is part of the initial shaping of the component during its                                                                                                                                                                                    | 246 | 243 | 0.507105 | 1.977165 | 0 | 0.003775 | 6257 | tags=66%,<br>list=33%,                |

|                                                                                                      |                                                                                                                                                                                                                                           |     |     |          |          |   |              |      |                                       |
|------------------------------------------------------------------------------------------------------|-------------------------------------------------------------------------------------------------------------------------------------------------------------------------------------------------------------------------------------------|-----|-----|----------|----------|---|--------------|------|---------------------------------------|
| SSEMBLY_INVO<br>LVED_IN_MORP<br>HOGENESIS                                                            | developmental progression.                                                                                                                                                                                                                |     |     |          |          |   |              |      | signal=98%                            |
| GO_INNATE_IM<br>MUNE_RESPONS<br>E_ACTIVATING_<br>CELL_SURFACE<br>_RECEPTOR_SIG<br>NALING_PATHW<br>AY | Any series of molecular signals leading to activation of the innate immune response generated as a consequence of binding to a cell surface receptor.                                                                                     | 106 | 106 | 0.531578 | 1.976808 | 0 | 0.0035<br>24 | 5097 | tags=61%,<br>list=27%,<br>signal=83%  |
| GO_G_PROTEIN_<br>COUPLED_PURI<br>NERGIC_RECEPTOR_SIGNALING_<br>PATHWAY                               | The series of molecular signals generated as a consequence of a receptor binding to an extracellular purine or purine derivative and transmitting the signal to a heterotrimeric G-protein complex to initiate a change in cell activity. | 20  | 20  | 0.670494 | 1.971055 | 0 | 0.0037<br>16 | 1398 | tags=45%,<br>list=7%,<br>signal=49%   |
| GO_MICROTUBU<br>LE_BUNDLE_FO<br>RMATION                                                              | A process that results in a parallel arrangement of microtubules.                                                                                                                                                                         | 69  | 69  | 0.556537 | 1.9708   | 0 | 0.0034<br>98 | 6210 | tags=75%,<br>list=33%,<br>signal=112% |
| GO_REGULATIO<br>N_OF_CELLULA<br>R_AMINE_META<br>BOLIC_PROCESS                                        | Any process that modulates the frequency, rate or extent of the chemical reactions and pathways by which individual cells transform amines.                                                                                               | 88  | 86  | 0.543528 | 1.957915 | 0 | 0.0044<br>58 | 5267 | tags=59%,<br>list=28%,<br>signal=82%  |
| GO_PROTEIN_TR<br>ANSPORT_ALON<br>G_MICROTUBUL                                                        | The directed movement of a protein along a microtubule, mediated by motor proteins.                                                                                                                                                       | 27  | 27  | 0.624676 | 1.935863 | 0 | 0.0058<br>13 | 4485 | tags=74%,<br>list=24%,<br>signal=97%  |

|                                                     |                                                                                                                                                                                                                                                                                                                                                                                                                                                                       |     |     |          |          |   |          |      |                                      |
|-----------------------------------------------------|-----------------------------------------------------------------------------------------------------------------------------------------------------------------------------------------------------------------------------------------------------------------------------------------------------------------------------------------------------------------------------------------------------------------------------------------------------------------------|-----|-----|----------|----------|---|----------|------|--------------------------------------|
| E                                                   |                                                                                                                                                                                                                                                                                                                                                                                                                                                                       |     |     |          |          |   |          |      |                                      |
| GO_TUMOR_NECROSIS_FACTOR_MEDIATED_SIGNALING_PATHWAY | A series of molecular signals initiated by the binding of a tumor necrosis factor to a receptor on the surface of a cell, and ending with regulation of a downstream cellular process, e.g. transcription.                                                                                                                                                                                                                                                            | 118 | 118 | 0.51698  | 1.927795 | 0 | 0.006466 | 4810 | tags=58%,<br>list=25%,<br>signal=77% |
| GO_EPITHELIAL_CILIUM_MOVEMENT                       | The directed, self-propelled movement of a cilium of an epithelial cell. This movement is usually coordinated between many epithelial cells, and serves to move fluid.                                                                                                                                                                                                                                                                                                | 18  | 18  | 0.675649 | 1.921556 | 0 | 0.006741 | 3249 | tags=67%,<br>list=17%,<br>signal=80% |
| GO_CENTROMERE_COMPLEX_ASSEMBLY                      | The aggregation, arrangement and bonding together of proteins and centromeric DNA molecules to form a centromeric protein-DNA complex. Includes the formation of the chromatin structures which form a platform for the kinetochore, and assembly of the kinetochore onto this specialized chromatin. In fission yeast and higher eukaryotes this process also includes the formation of heterochromatin at the outer repeat (pericentric) regions of the centromere. | 48  | 47  | 0.565253 | 1.914224 | 0 | 0.007808 | 3457 | tags=49%,<br>list=18%,<br>signal=60% |
| GO_ACTIVATION_OF_INNATE_IMMUNE_RESPONSE             | Any process that initiates an innate immune response. Innate immune responses are defense responses mediated by germline encoded components that directly recognize components of potential pathogens. Examples of this process include activation of the hypersensitive response                                                                                                                                                                                     | 204 | 204 | 0.496959 | 1.913388 | 0 | 0.007591 | 4810 | tags=55%,<br>list=25%,<br>signal=73% |

|                                                        |                                                                                                                                                                                                               |     |     |          |          |   |          |      |                                |
|--------------------------------------------------------|---------------------------------------------------------------------------------------------------------------------------------------------------------------------------------------------------------------|-----|-----|----------|----------|---|----------|------|--------------------------------|
|                                                        | of <i>Arabidopsis thaliana</i> and activation of any NOD or TLR signaling pathway in vertebrate species.                                                                                                      |     |     |          |          |   |          |      |                                |
| GO_DNA_REPLICATION_INITIATION                          | The process in which DNA-dependent DNA replication is started; this involves the separation of a stretch of the DNA double helix, the recruitment of DNA polymerases and the initiation of polymerase action. | 29  | 29  | 0.613686 | 1.912026 | 0 | 0.007354 | 4447 | tags=66%, list=24%, signal=86% |
| GO_POSITIVE_REGULATION_OF_LEUKOCYTE_DEGRANULATION      | Any process that activates or increases the frequency, rate or extent of leukocyte degranulation.                                                                                                             | 18  | 18  | 0.678421 | 1.909903 | 0 | 0.00721  | 1743 | tags=44%, list=9%, signal=49%  |
| GO_DNA_REPLICATION_INDEPENDENT_NUCLEOSOME_ORGANIZATION | The formation or destruction of chromatin structures, occurring outside the context of DNA replication.                                                                                                       | 53  | 52  | 0.553377 | 1.898449 | 0 | 0.008567 | 3434 | tags=48%, list=18%, signal=59% |
| GO_HISTONE_EXCHANGE                                    | The replacement, within chromatin, of resident histones or histone subunits with alternative, sometimes variant, histones or subunits.                                                                        | 53  | 50  | 0.556231 | 1.8943   | 0 | 0.00888  | 3588 | tags=50%, list=19%, signal=62% |
| GO_ARP2_3_COMPLEX_MEDIATED_ACTIN_NUCLEATION            | The actin nucleation process in which actin monomers combine to form a new branch on the side of an existing actin filament; mediated by the Arp2/3 protein complex and its interaction with other proteins.  | 17  | 16  | 0.676048 | 1.886944 | 0 | 0.00981  | 2061 | tags=56%, list=11%, signal=63% |
| GO_FC_RECEPT                                           | A series of molecular signals initiated by the                                                                                                                                                                | 184 | 184 | 0.48933  | 1.880329 | 0 | 0.0105   | 5370 | tags=57%,                      |

|                                          |                                                                                                                                                                                                                                                                                                                                                                                                                               |     |     |          |          |   |          |      |                                      |
|------------------------------------------|-------------------------------------------------------------------------------------------------------------------------------------------------------------------------------------------------------------------------------------------------------------------------------------------------------------------------------------------------------------------------------------------------------------------------------|-----|-----|----------|----------|---|----------|------|--------------------------------------|
| OR_SIGNALING_PATHWAY                     | binding of the Fc portion of an immunoglobulin to an Fc receptor on the surface of a signal-receiving cell, and ending with regulation of a downstream cellular process, e.g. transcription. The Fc portion of an immunoglobulin is its C-terminal constant region.                                                                                                                                                           |     |     |          |          |   | 46       |      | list=28%,<br>signal=79%              |
| GO_NIK_NF_KAPPA_B_PATHWAY                | The process in which a signal is passed on to downstream components within the cell through the NIK-dependent processing and activation of NF-KappaB. Begins with activation of the NF-KappaB-inducing kinase (NIK), which in turn phosphorylates and activates IkkappaB kinase alpha (IKKalpha). IKKalpha phosphorylates the NF-Kappa B2 protein (p100) leading to p100 processing and release of an active NF-KappaB (p52). | 83  | 83  | 0.522677 | 1.880146 | 0 | 0.010257 | 5721 | tags=65%,<br>list=30%,<br>signal=93% |
| GO_REGULATION_OF_MAST_CELL_ACTIVATION    | Any process that modulates the frequency, rate, or extent of mast cell activation.                                                                                                                                                                                                                                                                                                                                            | 39  | 39  | 0.57207  | 1.856464 | 0 | 0.014127 | 1965 | tags=41%,<br>list=10%,<br>signal=46% |
| GO_FC_EPSILON_RECEPTOR_SIGNALING_PATHWAY | A series of molecular signals initiated by the binding of the Fc portion of immunoglobulin E (IgE) to an Fc-epsilon receptor on the surface of a signal-receiving cell, and ending with regulation of a downstream cellular process, e.g. transcription. The Fc portion of an immunoglobulin is its C-terminal constant region.                                                                                               | 124 | 124 | 0.494486 | 1.850292 | 0 | 0.014984 | 5671 | tags=60%,<br>list=30%,<br>signal=86% |

|                                                                           |                                                                                                                                                                                                                                                                                                                                                                           |     |     |          |          |          |          |      |                                      |
|---------------------------------------------------------------------------|---------------------------------------------------------------------------------------------------------------------------------------------------------------------------------------------------------------------------------------------------------------------------------------------------------------------------------------------------------------------------|-----|-----|----------|----------|----------|----------|------|--------------------------------------|
| GO_POSTREPLICATION_REPAIR                                                 | The conversion of DNA-damage induced single-stranded gaps into large molecular weight DNA after replication. Includes pathways that remove replication-blocking lesions in conjunction with DNA replication.                                                                                                                                                              | 54  | 53  | 0.540637 | 1.845695 | 0        | 0.01579  | 6026 | tags=68%,<br>list=32%,<br>signal=99% |
| GO_ACTIVATION_OF_IMMUNE_RESPONSE                                          | Any process that initiates an immune response.                                                                                                                                                                                                                                                                                                                            | 395 | 393 | 0.462227 | 1.832675 | 0        | 0.018657 | 5116 | tags=51%,<br>list=27%,<br>signal=69% |
| GO_REGULATION_OF_ACTIVATED_T_CELL_PROLIFERATION                           | Any process that modulates the frequency, rate or extent of activated T cell proliferation.                                                                                                                                                                                                                                                                               | 40  | 40  | 0.555731 | 1.830281 | 0        | 0.018475 | 4489 | tags=55%,<br>list=24%,<br>signal=72% |
| GO_NEGATIVE_REGULATION_OF_CYTOKINE_PRODUCTION_INVOLVED_IN_IMMUNE_RESPONSE | Any process that stops, prevents, or reduces the frequency, rate, or extent of cytokine production contributing to an immune response.                                                                                                                                                                                                                                    | 22  | 20  | 0.62373  | 1.830009 | 0.002191 | 0.01804  | 4807 | tags=70%,<br>list=25%,<br>signal=94% |
| GO_PHAGOCYTOSIS_ENGULFMENT                                                | The internalization of bacteria, immune complexes and other particulate matter or of an apoptotic cell by phagocytosis, including the membrane and cytoskeletal processes required, which involves one of three mechanisms: zippering of pseudopods around a target via repeated receptor-ligand interactions, sinking of the target directly into plasma membrane of the | 19  | 19  | 0.638586 | 1.829346 | 0.001115 | 0.017808 | 3576 | tags=47%,<br>list=19%,<br>signal=58% |

|                                          |                                                                                                                                                                                                                                                                                                                               |     |     |          |          |          |          |      |                                      |
|------------------------------------------|-------------------------------------------------------------------------------------------------------------------------------------------------------------------------------------------------------------------------------------------------------------------------------------------------------------------------------|-----|-----|----------|----------|----------|----------|------|--------------------------------------|
|                                          | phagocytosing cell, or induced uptake via an enhanced membrane ruffling of the phagocytosing cell similar to macropinocytosis.                                                                                                                                                                                                |     |     |          |          |          |          |      |                                      |
| GO_MICROTUBULE_BASED_MOVEMENT            | A microtubule-based process that is mediated by motor proteins and results in the movement of organelles, other microtubules, or other particles along microtubules.                                                                                                                                                          | 204 | 204 | 0.47551  | 1.828026 | 0        | 0.017612 | 6351 | tags=63%,<br>list=34%,<br>signal=94% |
| GO_FC_GAMMA_RECEPTOR_SIGNALING_PATHWAY   | A series of molecular signals initiated by the binding of the Fc portion of immunoglobulin G (IgG) to an Fc-gamma receptor on the surface of a signal-receiving cell, and ending with regulation of a downstream cellular process, e.g. transcription. The Fc portion of an immunoglobulin is its C-terminal constant region. | 74  | 74  | 0.512512 | 1.826751 | 0        | 0.0175   | 4574 | tags=53%,<br>list=24%,<br>signal=69% |
| GO_MEMBRANE_INVAGINATION                 | The infolding of a membrane, resulting in formation of a vesicle.                                                                                                                                                                                                                                                             | 29  | 29  | 0.586291 | 1.824261 | 0.001074 | 0.018054 | 2809 | tags=41%,<br>list=15%,<br>signal=49% |
| GO_TOLL_LIKE_RECEPTOR_SIGNALING_PATHWAY  | Any series of molecular signals generated as a consequence of binding to a toll-like receptor. Toll-like receptors directly bind pattern motifs from a variety of microbial sources to initiate innate immune response.                                                                                                       | 85  | 85  | 0.501569 | 1.822334 | 0        | 0.018029 | 4808 | tags=54%,<br>list=25%,<br>signal=72% |
| GO_REGULATION_OF_LEUKOCYTE_DEGRANULATION | Any process that modulates the frequency, rate, or extent of leukocyte degranulation.                                                                                                                                                                                                                                         | 41  | 41  | 0.550714 | 1.814765 | 0        | 0.019578 | 1965 | tags=41%,<br>list=10%,<br>signal=46% |

|                                                                       |                                                                                                                                                                                                          |     |     |          |          |          |          |      |                                      |
|-----------------------------------------------------------------------|----------------------------------------------------------------------------------------------------------------------------------------------------------------------------------------------------------|-----|-----|----------|----------|----------|----------|------|--------------------------------------|
| GO_IMMUNE_RESPONSE_REGULATING_CELL_SURFACE_RECEPTOR_SIGNALING_PATHWAY | A series of molecular signals initiated by the binding of an extracellular ligand to a receptor on the surface of the target cell capable of activating, perpetuating, or inhibiting an immune response. | 291 | 291 | 0.458731 | 1.809802 | 0        | 0.020659 | 5370 | tags=52%,<br>list=28%,<br>signal=71% |
| GO_NEGATIVE_REGULATION_OF_INTERLEUKIN_10_PRODUCTION                   | Any process that stops, prevents, or reduces the frequency, rate, or extent of interleukin-10 production.                                                                                                | 16  | 16  | 0.648554 | 1.808228 | 0.001121 | 0.020554 | 3642 | tags=63%,<br>list=19%,<br>signal=77% |
| GO_POSITIVE_REGULATION_OF_ALPHA_BETA_T_CELL_ACTIVATION                | Any process that activates or increases the frequency, rate or extent of alpha-beta T cell activation.                                                                                                   | 51  | 51  | 0.532566 | 1.806057 | 0.001035 | 0.020749 | 4731 | tags=59%,<br>list=25%,<br>signal=78% |
| GO_NEGATIVE_REGULATION_OF_CD4_POSITIVE_ALPHA_BETA_T_CELL_ACTIVATION   | Any process that stops, prevents or reduces the frequency, rate or extent of CD4-positive, alpha-beta T cell activation.                                                                                 | 15  | 15  | 0.660857 | 1.803119 | 0.001129 | 0.021139 | 4083 | tags=73%,<br>list=22%,<br>signal=93% |
| GO_REGULATION_OF_T_HELPER_1_TYPE_IMMUNE_RESPONSE                      | Any process that modulates the frequency, rate, or extent of a T-helper 1 type immune response.                                                                                                          | 22  | 22  | 0.604663 | 1.80104  | 0.001076 | 0.021352 | 4743 | tags=73%,<br>list=25%,<br>signal=97% |



|                                                                                                   |                                                                                                                                                                                                                 |     |     |          |          |             |              |      |                                       |
|---------------------------------------------------------------------------------------------------|-----------------------------------------------------------------------------------------------------------------------------------------------------------------------------------------------------------------|-----|-----|----------|----------|-------------|--------------|------|---------------------------------------|
| GO_ACTIN_NUCLEATION                                                                               | The initial step in the formation of an actin filament, in which actin monomers combine to form a new filament. Nucleation is slow relative to the subsequent addition of more monomers to extend the filament. | 23  | 22  | 0.606668 | 1.793109 | 0.0011<br>1 | 0.0236<br>6  | 2061 | tags=45%,<br>list=11%,<br>signal=51%  |
| GO_SISTER_CHROMATID_SEGREGATION                                                                   | The cell cycle process in which sister chromatids are organized and then physically separated and apportioned to two or more sets.                                                                              | 176 | 176 | 0.467314 | 1.791245 | 0           | 0.0238<br>32 | 5978 | tags=59%,<br>list=32%,<br>signal=86%  |
| GO_NEGATIVE_REGULATION_OF_ALPHA_BETA_T_CELL_ACTIVATION                                            | Any process that stops, prevents, or reduces the frequency, rate or extent of alpha-beta T cell activation.                                                                                                     | 23  | 23  | 0.593821 | 1.787918 | 0           | 0.0246<br>4  | 4510 | tags=65%,<br>list=24%,<br>signal=86%  |
| GO_REGULATION_OF_PROTEIN_UBIQUITINATION_INVOLVED_IN_UBIQUITIN_DEPENDENT_PROTEIN_CATABOLIC_PROCESS | Any process that modulates the frequency, rate or extent of protein ubiquitination involved in ubiquitin-dependent protein catabolic process.                                                                   | 103 | 103 | 0.484081 | 1.78679  | 0           | 0.0244<br>34 | 6847 | tags=68%,<br>list=36%,<br>signal=106% |
| GO_POSITIVE_REGULATION_OF_ALPHA_BETA_T_CELL_DIFFERENTIATION                                       | Any process that activates or increases the frequency, rate or extent of alpha-beta T cell differentiation.                                                                                                     | 37  | 37  | 0.544316 | 1.786124 | 0           | 0.0243<br>45 | 4731 | tags=59%,<br>list=25%,<br>signal=79%  |

|                                                     |                                                                                                                                                                                                                                                                                                               |     |     |          |          |          |          |      |                                       |
|-----------------------------------------------------|---------------------------------------------------------------------------------------------------------------------------------------------------------------------------------------------------------------------------------------------------------------------------------------------------------------|-----|-----|----------|----------|----------|----------|------|---------------------------------------|
| GO_ORGANELLE_ASSEMBLY                               | The aggregation, arrangement and bonding together of a set of components to form an organelle. An organelle is an organized structure of distinctive morphology and function. Includes the nucleus, mitochondria, plastids, vacuoles, vesicles, ribosomes and the cytoskeleton. Excludes the plasma membrane. | 494 | 485 | 0.44703  | 1.784689 | 0        | 0.024652 | 6210 | tags=56%,<br>list=33%,<br>signal=81%  |
| GO_REGULATION_OF_DEFENSE_RESPONSE_TO_VIRUS_BY_VIRUS | Any viral process that modulates the frequency, rate, or extent of the antiviral response of the host cell or organism.                                                                                                                                                                                       | 29  | 29  | 0.566741 | 1.783904 | 0.002114 | 0.024458 | 5834 | tags=69%,<br>list=31%,<br>signal=100% |
| GO_NEURON_APOPTOTIC_PROCESS                         | Any apoptotic process in a neuron, the basic cellular unit of nervous tissue. Each neuron consists of a body, an axon, and dendrites. Their purpose is to receive, conduct, and transmit impulses in the nervous system.                                                                                      | 34  | 34  | 0.549446 | 1.781323 | 0.002101 | 0.025112 | 3946 | tags=53%,<br>list=21%,<br>signal=67%  |
| GO_REGULATION_OF_B_CELL_RECEPTOR_SIGNALING_PATHWAY  | Any process that modulates the frequency, rate or extent of signaling pathways initiated by the cross-linking of an antigen receptor on a B cell.                                                                                                                                                             | 15  | 15  | 0.658617 | 1.780691 | 0        | 0.024798 | 6139 | tags=93%,<br>list=32%,<br>signal=138% |
| GO_POSITIVE_REGULATION_OF_INNATE_IMMUNE_RESPONSE    | Any process that activates or increases the frequency, rate or extent of the innate immune response, the organism's first line of defense against infection.                                                                                                                                                  | 246 | 245 | 0.457053 | 1.779914 | 0        | 0.024661 | 5121 | tags=52%,<br>list=27%,<br>signal=71%  |

|                                                            |                                                                                                                                                                                                                                                                                                                                                                                     |     |     |          |          |          |          |      |                                       |
|------------------------------------------------------------|-------------------------------------------------------------------------------------------------------------------------------------------------------------------------------------------------------------------------------------------------------------------------------------------------------------------------------------------------------------------------------------|-----|-----|----------|----------|----------|----------|------|---------------------------------------|
| GO_ANTIGEN_PROCESSING_AND_PRESENTATION_OF_PEPTIDE_ANTIGEN  | The process in which an antigen-presenting cell expresses peptide antigen in association with an MHC protein complex on its cell surface, including proteolysis and transport steps for the peptide antigen both prior to and following assembly with the MHC protein complex. The peptide antigen is typically, but not always, processed from an endogenous or exogenous protein. | 177 | 176 | 0.465463 | 1.775874 | 0        | 0.025376 | 5178 | tags=54%,<br>list=27%,<br>signal=74%  |
| GO_RECOMBINATIONAL_REPAIR                                  | A DNA repair process that involves the exchange, reciprocal or nonreciprocal, of genetic material between the broken DNA molecule and a homologous region of DNA.                                                                                                                                                                                                                   | 80  | 80  | 0.490868 | 1.77303  | 0        | 0.026227 | 7858 | tags=75%,<br>list=42%,<br>signal=128% |
| GO_REGULATION_OF_INTERLEUKIN_10_PRODUCTION                 | Any process that modulates the frequency, rate, or extent of interleukin-10 production.                                                                                                                                                                                                                                                                                             | 46  | 46  | 0.533125 | 1.772059 | 0.001042 | 0.026073 | 3747 | tags=50%,<br>list=20%,<br>signal=62%  |
| GO_POSITIVE_REGULATION_OF_T_CELL_PROLIFERATION             | Any process that activates or increases the rate or extent of T cell proliferation.                                                                                                                                                                                                                                                                                                 | 95  | 94  | 0.480326 | 1.768804 | 0        | 0.026836 | 4554 | tags=48%,<br>list=24%,<br>signal=63%  |
| GO_REGULATION_OF_TELOMERASE_RNA_LOCALIZATION_TO_CAJAL_BODY | Any process that modulates the frequency, rate or extent of telomerase RNA localization to Cajal body.                                                                                                                                                                                                                                                                              | 15  | 15  | 0.6564   | 1.767992 | 0.001151 | 0.026632 | 4385 | tags=73%,<br>list=23%,<br>signal=95%  |

|                                                                                        |                                                                                                                                                                                                  |     |     |          |          |          |          |      |                                       |
|----------------------------------------------------------------------------------------|--------------------------------------------------------------------------------------------------------------------------------------------------------------------------------------------------|-----|-----|----------|----------|----------|----------|------|---------------------------------------|
| GO_NEGATIVE_REGULATION_OF_PROTEIN_MODIFICATION_BY_SMALL_PROTEIN_CONJUGATION_OR_REMOVAL | Any process that stops, prevents or reduces the frequency, rate or extent of protein modification by small protein conjugation or removal.                                                       | 139 | 137 | 0.46668  | 1.764314 | 0        | 0.027843 | 6583 | tags=63%,<br>list=35%,<br>signal=96%  |
| GO_POSITIVE_REGULATION_OF_CD4_POSITIVE_ALPHA_BETA_T_CELL_ACTIVATION                    | Any process that activates or increases the frequency, rate or extent of CD4-positive, alpha-beta T cell activation.                                                                             | 27  | 27  | 0.580162 | 1.762056 | 0        | 0.028308 | 4731 | tags=67%,<br>list=25%,<br>signal=89%  |
| GO_ANTIGEN_PROCESSING_AND_PRESENTATION                                                 | The process in which an antigen-presenting cell expresses antigen (peptide or lipid) on its cell surface in association with an MHC protein complex.                                             | 213 | 212 | 0.453509 | 1.761124 | 0        | 0.028264 | 5207 | tags=52%,<br>list=28%,<br>signal=71%  |
| GO_DEOXYRIBONUCLEOSIDE_TRIPHOSPHATE_METABOLIC_PROCESS                                  | The chemical reactions and pathways involving a deoxyribonucleoside triphosphate, a compound consisting of a nucleobase linked to a deoxyribose sugar esterified with triphosphate on the sugar. | 18  | 18  | 0.62885  | 1.756679 | 0.002193 | 0.029495 | 5286 | tags=72%,<br>list=28%,<br>signal=100% |
| GO_REGULATION_OF_TRANSCRIPTION_INVOLVED_IN_G1_S_TRANSITION                             | Any process that regulates transcription such that the target genes are involved in the transition between G1 and S phase of the mitotic cell cycle.                                             | 26  | 26  | 0.56919  | 1.754687 | 0.004329 | 0.029801 | 3333 | tags=58%,<br>list=18%,<br>signal=70%  |

|                                                    |                                                                                                                                                                                                                                                                                                                                     |     |     |          |          |          |          |      |                                       |
|----------------------------------------------------|-------------------------------------------------------------------------------------------------------------------------------------------------------------------------------------------------------------------------------------------------------------------------------------------------------------------------------------|-----|-----|----------|----------|----------|----------|------|---------------------------------------|
| D_IN_G1_S_TRANSITION_OF_MITOTIC_CELL_CYCLE         |                                                                                                                                                                                                                                                                                                                                     |     |     |          |          |          |          |      |                                       |
| GO_REGULATION_OF_ESTABLISHMENT_OF_PLANAR_POLARITY  | Any process that modulates the rate, frequency or extent of the establishment of planar polarity, the coordinated organization of groups of cells in a tissue, such that they all orient to similar coordinates.                                                                                                                    | 110 | 110 | 0.473765 | 1.754052 | 0        | 0.029655 | 5155 | tags=52%,<br>list=27%,<br>signal=71%  |
| GO_MOTILE_CILIUM_ASSEMBLY                          | The assembly of a motile cilium, a cilium that contains a regular longitudinal array of axonemal microtubules. In vertebrates, motile cilia are usually formed around a 9 + 2 microtubule core structure. Motile cilia are often found in tissues where propagation of fluid is necessary for proper organ development or function. | 15  | 15  | 0.642745 | 1.752973 | 0.001129 | 0.029677 | 6094 | tags=87%,<br>list=32%,<br>signal=128% |
| GO_T_CELL_RECEPTOR_SIGNALING_PATHWAY               | A series of molecular signals initiated by the cross-linking of an antigen receptor on a T cell.                                                                                                                                                                                                                                    | 143 | 143 | 0.462659 | 1.742559 | 0        | 0.033852 | 5671 | tags=57%,<br>list=30%,<br>signal=81%  |
| GO_REGULATION_OF_T_CELL_PROLIFERATION              | Any process that modulates the frequency, rate or extent of T cell proliferation.                                                                                                                                                                                                                                                   | 147 | 145 | 0.456889 | 1.740508 | 0        | 0.034398 | 4554 | tags=47%,<br>list=24%,<br>signal=61%  |
| GO_ANTIGEN_PROCESSING_AND_PRESENTATION_OF_PEPTIDES | The process in which an antigen-presenting cell expresses a peptide antigen on its cell surface in association with an MHC class I protein complex. Class I here refers to classical class I molecules.                                                                                                                             | 91  | 90  | 0.479693 | 1.736753 | 0        | 0.036032 | 4810 | tags=52%,<br>list=25%,<br>signal=70%  |

|                                                       |                                                                                                                                     |     |     |          |          |          |          |      |                                       |
|-------------------------------------------------------|-------------------------------------------------------------------------------------------------------------------------------------|-----|-----|----------|----------|----------|----------|------|---------------------------------------|
| ANTIGEN_VIA_MHC_CLASS_I                               |                                                                                                                                     |     |     |          |          |          |          |      |                                       |
| GO_CHROMOSOME_LOCALIZATION                            | Any process in which a chromosome is transported to, or maintained in, a specific location.                                         | 61  | 60  | 0.499352 | 1.736538 | 0        | 0.035642 | 6253 | tags=63%,<br>list=33%,<br>signal=94%  |
| GO_NEGATIVE_REGULATION_OF_LEUKOCYTE_MEDIATED_IMMUNITY | Any process that stops, prevents, or reduces the frequency, rate, or extent of leukocyte mediated immunity.                         | 47  | 46  | 0.516146 | 1.735269 | 0.001037 | 0.035709 | 4868 | tags=57%,<br>list=26%,<br>signal=76%  |
| GO_NEGATIVE_REGULATION_OF_INTERLEUKIN_12_PRODUCTION   | Any process that stops, prevents, or reduces the frequency, rate, or extent of interleukin-12 production.                           | 15  | 15  | 0.642571 | 1.734778 | 0.002235 | 0.035548 | 3315 | tags=67%,<br>list=18%,<br>signal=81%  |
| GO_REGULATION_OF_T_HELPER_CELL_DIFFERENTIATION        | Any process that modulates the frequency, rate or extent of T-helper cell differentiation.                                          | 26  | 26  | 0.572129 | 1.734592 | 0.002144 | 0.035142 | 4731 | tags=62%,<br>list=25%,<br>signal=82%  |
| GO_ANTIGEN_RECEPTOR_MEDIATED_SIGNALING_PATHWAY        | A series of molecular signals initiated by the cross-linking of an antigen receptor on a B or T cell.                               | 173 | 173 | 0.454074 | 1.73221  | 0        | 0.035912 | 5671 | tags=56%,<br>list=30%,<br>signal=79%  |
| GO_REGULATION_OF_INTERFERON_GAMMA_PRODUCTION          | Any process that modulates the frequency, rate, or extent of interferon-gamma production. Interferon-gamma is also known as type II | 97  | 97  | 0.463377 | 1.731026 | 0        | 0.036189 | 7304 | tags=67%,<br>list=39%,<br>signal=109% |

|                                                              |                                                                                                                                                                                                                                                                                                                                                      |     |     |          |          |              |              |      |                                      |
|--------------------------------------------------------------|------------------------------------------------------------------------------------------------------------------------------------------------------------------------------------------------------------------------------------------------------------------------------------------------------------------------------------------------------|-----|-----|----------|----------|--------------|--------------|------|--------------------------------------|
| ODUCTION                                                     | interferon.                                                                                                                                                                                                                                                                                                                                          |     |     |          |          |              |              |      |                                      |
| GO_TRANSLESION_SYNTHESIS                                     | The replication of damaged DNA by synthesis across a lesion in the template strand; a specialized DNA polymerase or replication complex inserts a defined nucleotide across from the lesion which allows DNA synthesis to continue beyond the lesion. This process can be mutagenic depending on the damaged nucleotide and the inserted nucleotide. | 41  | 41  | 0.519214 | 1.731018 | 0.0010<br>41 | 0.0357<br>31 | 6026 | tags=66%,<br>list=32%,<br>signal=96% |
| GO_REGULATION_OF_INFLAMMATORY_RESPONSE_TO_ANTIGENIC_STIMULUS | Any process that modulates the frequency, rate, or extent of an inflammatory response to an antigenic stimulus.                                                                                                                                                                                                                                      | 19  | 19  | 0.609447 | 1.729963 | 0            | 0.0360<br>17 | 3280 | tags=47%,<br>list=17%,<br>signal=57% |
| GO_REGULATION_OF_INTERLEUKIN_17_PRODUCTION                   | Any process that modulates the frequency, rate, or extent of production of any member of the interleukin-17 family of cytokines.                                                                                                                                                                                                                     | 22  | 22  | 0.584916 | 1.729932 | 0            | 0.0355<br>96 | 3747 | tags=55%,<br>list=20%,<br>signal=68% |
| GO_PROTEIN_REFOLDING                                         | The process carried out by a cell that restores the biological activity of an unfolded or misfolded protein, using helper proteins such as chaperones.                                                                                                                                                                                               | 20  | 20  | 0.590099 | 1.729342 | 0            | 0.0353<br>8  | 5114 | tags=60%,<br>list=27%,<br>signal=82% |
| GO_MICROTUBULE_CYTOSKELETON_ORGANIZATION                     | A process that is carried out at the cellular level which results in the assembly, arrangement of constituent parts, or disassembly of cytoskeletal structures comprising microtubules and their associated proteins.                                                                                                                                | 348 | 345 | 0.437395 | 1.727244 | 0            | 0.0358<br>75 | 6267 | tags=58%,<br>list=33%,<br>signal=85% |

|                                                         |                                                                                                                          |     |     |          |          |          |          |      |                                       |
|---------------------------------------------------------|--------------------------------------------------------------------------------------------------------------------------|-----|-----|----------|----------|----------|----------|------|---------------------------------------|
| GO_CILIUM_OR_FLAGELLUM_DEPENDENT_CELL_MOTILITY          | Cell motility due to movement of eukaryotic cilia or bacterial-type flagella or archaeal-type flagella.                  | 15  | 15  | 0.640362 | 1.726164 | 0.001129 | 0.035976 | 6094 | tags=87%,<br>list=32%,<br>signal=128% |
| GO_POSITIVE_REGULATION_OF_MAST_CELL_ACTIVATION          | Any process that activates or increases the frequency, rate, or extent of mast cell activation.                          | 16  | 16  | 0.619549 | 1.724413 | 0.003359 | 0.036507 | 1743 | tags=38%,<br>list=9%,<br>signal=41%   |
| GO_SISTER_CHROMATID_COHESION                            | The cell cycle process in which the sister chromatids of a replicated chromosome are associated with each other.         | 111 | 111 | 0.467519 | 1.723912 | 0        | 0.036291 | 5804 | tags=58%,<br>list=31%,<br>signal=83%  |
| GO_METAPHASE_PLATE_CONGRESSION                          | The alignment of chromosomes at the metaphase plate (spindle equator), a plane halfway between the poles of the spindle. | 42  | 42  | 0.520735 | 1.723309 | 0        | 0.036091 | 6246 | tags=71%,<br>list=33%,<br>signal=106% |
| GO_REGULATION_OF_ALPHA_BETA_T_CELL_DIFFERENTIATION      | Any process that modulates the frequency, rate or extent of alpha-beta T cell differentiation.                           | 46  | 46  | 0.502913 | 1.7229   | 0.001034 | 0.035896 | 4731 | tags=54%,<br>list=25%,<br>signal=72%  |
| GO_POSITIVE_REGULATION_OF_T_HELPER_CELL_DIFFERENTIATION | Any process that activates or increases the frequency, rate or extent of T-helper cell differentiation.                  | 18  | 18  | 0.608733 | 1.717242 | 0.001104 | 0.038133 | 4731 | tags=67%,<br>list=25%,<br>signal=89%  |
| GO_REGULATION_OF_ALPHA_BETA_T_CELL_ACTIVATION           | Any process that modulates the frequency, rate or extent of alpha-beta T cell activation.                                | 68  | 68  | 0.485921 | 1.713339 | 0        | 0.039838 | 4731 | tags=53%,<br>list=25%,<br>signal=70%  |



|                                              |                                                                                                                                                                                                                                                                                                                                                                                               |     |     |          |          |          |          |      |                                |
|----------------------------------------------|-----------------------------------------------------------------------------------------------------------------------------------------------------------------------------------------------------------------------------------------------------------------------------------------------------------------------------------------------------------------------------------------------|-----|-----|----------|----------|----------|----------|------|--------------------------------|
| TIVATION                                     |                                                                                                                                                                                                                                                                                                                                                                                               |     |     |          |          |          |          |      |                                |
| GO_PURINERGIC_RECEPTOR_SIGNALING_PATHWAY     | The series of molecular signals generated as a consequence of a receptor binding to an extracellular purine or purine derivative to initiate a change in cell activity.                                                                                                                                                                                                                       | 28  | 28  | 0.549702 | 1.711892 | 0.003191 | 0.040188 | 1467 | tags=36%, list=8%, signal=39%  |
| GO_PROTEIN_COMPLEX_LOCALIZATION              | A localization process that acts on a protein complex; the complex is transported to, or maintained in, a specific location.                                                                                                                                                                                                                                                                  | 53  | 53  | 0.498167 | 1.705101 | 0        | 0.043721 | 5795 | tags=60%, list=31%, signal=87% |
| GO_REGULATION_OF_CELL_CYCLE_PHASE_TRANSITION | Any process that modulates the frequency, rate or extent of cell cycle phase transition.                                                                                                                                                                                                                                                                                                      | 321 | 319 | 0.430704 | 1.704027 | 0        | 0.04386  | 6614 | tags=58%, list=35%, signal=88% |
| GO_MITOTIC_SISTER_CHROMATID_SEGREGATION      | The cell cycle process in which replicated homologous chromosomes are organized and then physically separated and apportioned to two sets during the mitotic cell cycle. Each replicated chromosome, composed of two sister chromatids, aligns at the cell equator, paired with its homologous partner. One homolog of each morphologic type goes into each of the resulting chromosome sets. | 91  | 91  | 0.464764 | 1.701399 | 0        | 0.045009 | 6614 | tags=65%, list=35%, signal=99% |
| GO_NUCLEAR_CHROMOSOME_SEGREGATION            | The process in which genetic material, in the form of nuclear chromosomes, is organized into specific structures and then physically separated and apportioned to two or more sets. Nuclear chromosome segregation begins with the                                                                                                                                                            | 228 | 226 | 0.434248 | 1.692999 | 0        | 0.049793 | 6696 | tags=57%, list=35%, signal=87% |

|  |                                                                                                                                      |  |  |  |  |  |  |  |  |
|--|--------------------------------------------------------------------------------------------------------------------------------------|--|--|--|--|--|--|--|--|
|  | condensation of chromosomes, includes chromosome separation, and ends when chromosomes have completed movement to the spindle poles. |  |  |  |  |  |  |  |  |
|--|--------------------------------------------------------------------------------------------------------------------------------------|--|--|--|--|--|--|--|--|

**Table E8. Primer Sequences of inflammatory factors for qRT-PCR Validation.**

| Genes   | RNA-seq Analysis               |                     | qRT-PCR Validation        |                           |             |                |
|---------|--------------------------------|---------------------|---------------------------|---------------------------|-------------|----------------|
|         | log <sub>2</sub> (Fold Change) | adj. <i>P</i> Value | Forward Primer (5' to 3') | Reverse Primer (5' to 3') | Fold Change | <i>P</i> Value |
| CCL7    | 9.750                          | 1.52E-06            | TTGCTCAGCCAGTTGGGATT      | GACAGTGGCTACTGGTGGTC      | 98.53       | <0.001         |
| CCL18   | 7.028                          | 1.85E-16            | TGCTGCCTCGTCTATACCTC      | CCGGCCTCTCTTGGTTAGG       | 191.9       | <0.001         |
| CCL20   | 4.338                          | 0.00148             | GCTCCTGGCTGCTTTGATGT      | GCATTGATGTCACAGCCTTCA     | 3.742       | <0.05          |
| CXCL6   | 4.225                          | 3.72E-08            | TGCGTTGCACTTGTTTACGC      | CTTCCCGTTCTTCAGGGAGG      | 16.22       | <0.001         |
| CXCL8   | 2.574                          | 0.00806             | ACTGAGAGTGATTGAGAGTGGAC   | AACCCTCTGCACCCAGTTTTTC    | 5.076       | <0.05          |
| IFNG    | -1.644                         | 0.0139              | TCGGTAACTGACTTGAATGTCCA   | TCGCTTCCCTGTTTTAGCTGC     | -3.321      | <0.01          |
| IL13RA2 | -3.113                         | 1.02E-06            | ACCTGGCATAGGTGTACTTCT     | CCAAATAGGGAAATCTGCATCC    | -9.760      | <0.001         |
|         |                                |                     |                           | T                         |             |                |
| IL17REL | 4.570                          | 0.0257              | CAGGAGACGCAGTGTCAGAG      | TGGGCACTTGCACCAGAATC      | 9.366       | <0.01          |
| GAPDH   | 0.864                          | 0.139               | ACAGTTGCCATGTAGACC        | TTTTTGGTTGAGCACAGG        | -           | -              |

For RNA-seq Analysis, Fold change cutoff: 2.0; > 2.0 as upregulated and < - 2.0 as downregulated; adj. *P* < 0.05 was considered statistically significant. For qRT-PCR Validation, *P* < 0.05 was considered statistically significant.

**Table E9. Primer Sequences, Fold change, and adj. *P* Value of the DEGs for qRT-PCR Validation.**

| Genes  | RNA-seq Analysis               |                     | qRT-PCR Validation        |                           |             |                |
|--------|--------------------------------|---------------------|---------------------------|---------------------------|-------------|----------------|
|        | log <sub>2</sub> (Fold Change) | adj. <i>P</i> Value | Forward Primer (5' to 3') | Reverse Primer (5' to 3') | Fold Change | <i>P</i> Value |
| FOXJ1  | 2.808                          | 6.00 E-05           | GTGAAGCCTCCCTACTC         | AATTCTGCCAGGTGGG          | 2.196       | 0.028          |
| CP110  | 1.725                          | 9.11E-07            | CTTAGTAGACAAGGAACCCC      | CCGCTTCTTTGGATTTTC        | 0.7653      | 0.568          |
| DNAI1  | 3.206                          | 9.10E-06            | TCAGTGGGAGATCTATGATG      | ACTCCATAGATGTCAGCTTC      | 2.200       | 0.011          |
| DNALI1 | 2.421                          | 2.49E-07            | GGAGCAGTTAGACTTAAAGC      | ACTCATCAAAACACTGTGAG      | 0.533       | 0.718          |
| DNAH5  | 2.740                          | 0.003               | ACTGATGCAACTAATGAAGC      | AGTGTAGGAATAGCATCCATC     | 0.822       | 0.675          |
| DNAH9  | 2.884                          | 5.53E-04            | AGCAGGCCTCTAATTATCTC      | CTCTTTGAAGTAAGTGTGGAG     | 3.725       | 0.044          |
| RSPH1  | 3.095                          | 2.45E-06            | GGAAAGAGGAGAAGAGGAAG      | AATTCAGTGATTTGGGTAGC      | 2.534       | 0.001          |
| RSPH9  | 3.582                          | 7.96E-07            | GAATATGAACACACTGAGCTG     | CTTGATCTGGACCACTATTTTC    | 6.9310      | 0.005          |
| RSPH4A | 2.920                          | 5.44E-06            | TTTGACACCAATCTCTGAAG      | TTGTGGAATGAGATTTGAGG      | 4.372       | 0.015          |
| GAPDH  | 0.864                          | 0.139               | ACAGTTGCCATGTAGACC        | TTTTTGTTGAGCACAGG         | -           | -              |

For RNA-seq Analysis, Fold change cutoff: 2.0; > 2.0 as upregulated and < - 2.0 as downregulated; adj. *P* < 0.05 was considered statistically significant. For qRT-PCR Validation, *P* < 0.05 was considered statistically significant.
